# Supplementary material for: Motor cortex analogue neurons in songbirds utilize Kv3 channels to generate ultranarrow spikes
Source: eLife journal article supplement (doi:10.7554/elife.81992), 2023-05-09
Supplement: supp [file elife-81992-supp-v1.zip]

Archive with 12 entries (12 files):
- elife_poa_e81992_source_data_file_1.xlsx
- elife_poa_e81992_Figure_1_figure_supplement_1.pdf
- elife_poa_e81992_Figure_2_figure_supplement_1.pdf
- elife_poa_e81992_Figure_4_figure_supplement_1.pdf
- elife_poa_e81992_Figure_4_figure_supplement_2.pdf
- elife_poa_e81992_Figure_5_figure_supplement_1.pdf
- elife_poa_e81992_Figure_5_figure_supplement_2.pdf
- elife_poa_e81992_Figure_6_figure_supplement_1.pdf
- elife_poa_e81992_Figure_7_figure_supplement_1.tif
- elife_poa_e81992_Figure_7_figure_supplement_2.tif
- elife_poa_e81992_Figure_7_figure_supplement_3.tif
- elife_poa_e81992_Supplementary_file_1.docx
