# Supplementary material for: Motor cortex analogue neurons in songbirds utilize Kv3 channels to generate ultranarrow spikes
Source: eLife journal article supplement (doi:10.7554/elife.81992), 2023-05-09
Supplement: supp [file elife-81992-supp-v1.zip › elife_poa_e81992_source_data_file_1.xlsx]

## Sheet: Fig.1F
RA	AId
196.912	178.819
197.09	155.27
294.9	287.531
245.134	163.747
159.131	251.218
268.27	155.56

## Sheet: Fig.1G
radius	20µm							40µm							60µm							80µm							100µm							120µm							140µm
RA	6	5	4	8	4	6		9	10	9	9	7	6		10	11	12	9	9	8		11	13	18	7	9	11		9	11	14	8	8	11		6	8	9	2	6	6		4	5	5	0	5	2
AId	9	5	8	9	10	10		12	13	11	14	11	17		13	14	15	17	13	18		12	12	16	17	13	18		10	11	16	15	11	14		8	3	9	10	9	11		4	0	5	4	6	7
[truncated: 18 more columns]

## Sheet: Fig.1H
RA	AId
0.577778	1.21111
0.383333	0.822222
0.5	1.06667
0.3	0.944444
0.35	0.933333
0.308333	0.7

## Sheet: Fig. 2D
RA	AId
0.370045	1.17676
0.547809	1.17607
0.722751	1.02152
0.513896	0.96098
0.580835	1.00272
0.508879	1.23991
0.521752	1.01027
0.438313	1.17806
0.522327	1.46743
0.596628	1.35404
0.52125	1.23597
0.540511	0.789293
0.524517	0.718555
0.452544	1.23157
0.562087	1.82272
0.596587	1.02349
0.87105	1.3679
0.433348	1.12611
0.720621	1.14217
0.73394	1.4245
0.484682	1.19792
0.520277	1.12634
0.516782	1.25437
0.542726	1.3304
0.480018	1.31397
0.513957	0.961329
0.56665	1.09816
0.420254	0.968197
0.391419	1.68037
0.410546	1.42576
0.560819	1.47752
0.488981	1.58281
0.598807	1.051
0.664142	2.01412
0.685408	1.5083
0.760753	0.858675
0.883466
0.709922
0.736249

## Sheet: Fig.2E
	RA	AId
	303.7	62.8
	146.2	71.2
	104.9	67.9
	154.2	72.4
	168.6	71.7
	189.1	51.5
	180.8	75.4
	240	54.9
	181.6	43.8
	166.8	55.3
	183.4	64.1
	199.1	110.6
	194.1	139.7
	235.2	54.5
	177.9	33.7
	167.5	98.5
	77.5	54.7
	241.7	60.3
	134.9	53.4
	117.5	46.4
	223.6	47.7
	198.4	79.2
	210.7	61.8
	172	50.3
	218.9	49.1
	204.2	71.5
	176.4	73.6
	235.6	74.6
	279.1	36.9
	243.3	54.8
	180.3	51.9
	217.7	48.2
	171.8	81.1
	146.2	39.1
	141.8	49
	114	110.8
	113.1
	150.5
	131.7

## Sheet: Fig.2G
RA	AId
0.23366	0.334836
0.150507	0.324013
0.190593	0.291197
0.137152	0.276593
0.158005	0.309716
0.20981	0.307454
0.171112	0.285051
0.115381	0.354165
0.137609	0.362896
0.103337	0.367552
0.181366	0.32029
0.119701
0.142348

## Sheet: Fig.2H
RA	AID
442.9	261.7
543.6	244.9
464.1	645.9
651.4	560.6
772	639.4
351.7	433.2
740.8	703.8
1201.7	257.3
733.3	460.8
1560	374.4
766.4	723.5
1035.7
677.8

## Sheet: Fig.3B
	0pA			100pA			200pA			300pA			400pA			500pA
	RA	AId		RA	AId		RA	AId		RA	AId		RA	AId		RA	AId
	12	11		34	20		49	24		64	29		77	33		87	38
	11	2		32	17		43	24		55	28		63	32		69	34
	4	16		22	30		30	39		37	45		43	48		49	18
	8	12		25	25		37	35		47	42		55	48		62	54
	9	16		35	25		50	31		63	34		75	37		85	41
	16	23		36	30		50	33		61	35		70	36		79	20
	19	15		39	24		54	28		69	34		81	38		91	42
	18	15		36	24		50	31		62	37		72	42		81	47
	14	8		29	21		40	29		49	35		56	38		63	39
	30	12		38	20		51	27		65	33		78	38		87	42
	16	6		35	22		50	32		62	39		71	44		79	47
	3	10		35	25		54	36		69	45		81	53		89	59
	9	21		34	25		51	36		65	46		76	54		86	61
	8	12		29	30		43	43		55	52		65	58		73	5
	27	9		53	19		73	24		87	27		97	29		104	29
	25	1		37	25		53	37		68	47		80	54		90	58
	49	15		50	29		65	40		61	45		4	42		2	27
	24	10		38	22		49	30		63	37		73	43		82	47
	8	16		36	28		53	36		68	43		81	48		90	51
	7	12		24	23		33	30		40	36		47	40		52	42
	6	22		39	28		61	32		76	36		87	39		95	36
	7	5		41	22		65	31		82	37		95	44		104	48
	7	13		38	26		58	36		74	44		88	49		99	52
	13	19		45	28		62	36		74	41		83	45		89	47
	9	33		44	37		64	34		80	17		93	2		105	2
	7	21		35	34		50	42		62	49		73	53		83	54
	17	13		33	28		45	39		57	45		68	47		77	45
	26	24		47	45		63	55		75	62		85	67		93	67
	13	8		46	27		67	38		85	45		97	40		107	15
	25	17		43	20		56	25		67	30		77	34		85	39
	10	6		39	19		59	30		76	37		89	44		100	47
	11	6		42	17		62	24		78	30		91	35		100	38
	15	18		27	27		35	33		41	37		47	41		52	43
	6	5		31	21		45	30		58	35		66	36		72	23
	9	6		37	17		54	25		68	30		79	34		88	36
	8	7		31	23		44	34		54	44		64	49		71	55
	3			25			36			45			51			56
	4			23			35			44			51			57
	19			32			42			51			60			66

## Sheet: Fig.3D
		0pA			100pA			200pA			300pA			400pA			500pA
		RA	AId		RA	AId		RA	AId		RA	AId		RA	AId		RA	AId
		89	12		110	28		149	39		152	50		160	60		170	72
		22	0		71	1		113	7		152	36		185	45		215	54
		16	18		49	35		77	50		102	64		130	79		158	91
		22	1		67	26		99	45		137	61		170	75		200	87
		69	17		116	44		155	60		197	76		226	89		248	100
		63	24		148	44		155	61		149	76		191	92		167	106
		20	15		91	38		145	55		192	72		231	89		260	104
		37	5		100	41		146	69		187	87		220	102		250	108
		43	20		67	56		101	79		140	100		171	118		199	135
		30	16		86	51		140	75		196	94		244	107		287	118
		72	5		88	40		120	61		141	77		166	89		184	103
		21	25		102	58		146	84		182	106		215	124		252	142
		29			64			98			127			152			174

## Sheet: Fig.4C
RA	AId
1.85971	1.18319
1.99109	1.19319
1.66611	1.45521
1.65146	1.50068
1.58297	1.48855
1.8537

[truncated: 45 more sheets: Fig.4D, Fig.4G, Fig.4H, Fig.5A, Fig.5B, Fig.5C, Fig.5D, Fig. 6B, Fig.6C, Fig.6E, Fig.6F, Fig.6H, Fig. 6I, Fig. 6J, Fig.7B, Fig.7C, Fig.8A, Fig.8B, Fig.8C, Fig.8D …]
