# Supplementary material for: Motor cortex analogue neurons in songbirds utilize Kv3 channels to generate ultranarrow spikes
Source: eLife journal article supplement (doi:10.7554/elife.81992), 2023-05-09
Supplement: supp [file elife-81992-supp-v1.zip › elife_poa_e81992_Supplementary_file_1.docx]

|  | RA1 | RA2 | RA3 | AId1 | AId2 |
| --- | --- | --- | --- | --- | --- |
| Soma area (µm2) | 1125 | 599 | 915 | 721 | 733 |
| Dendrite area (µm2) | 5219 | 5672 | 4252 | 4143 | 6953 |
| Spine area (µm2) | 530 | 923 | 463 | 827 | 1074 |
| Axon area (µm2) | N/A | 99 | 286 | N/A | 1264 |
| Total area (µm2) | 6874 | 7194 | 5630 | 5691 | 8760 |
| Total Spine # | 401 | 517 | 276 | 850 | 974 |
| Spines/ µm | 0.25 | 0.28 | 0.2 | 0.45 | 0.39 |
| Dendritic Length | 1588 | 1883 | 1414 | 1901 | 2504 |
| Total volume (µm3) | 4722.6 | 3155.5 | 3737.6 | 2301.2 | 3017.8 |
| Total area/volume (1/µm) | 1.456 | 2.280 | 1.506 | 2.473 | 2.903 |
