# Supplementary figures and images for: Motor cortex analogue neurons in songbirds utilize Kv3 channels to generate ultranarrow spikes
Source: eLife journal article supplement (doi:10.7554/elife.81992), 2023-05-09

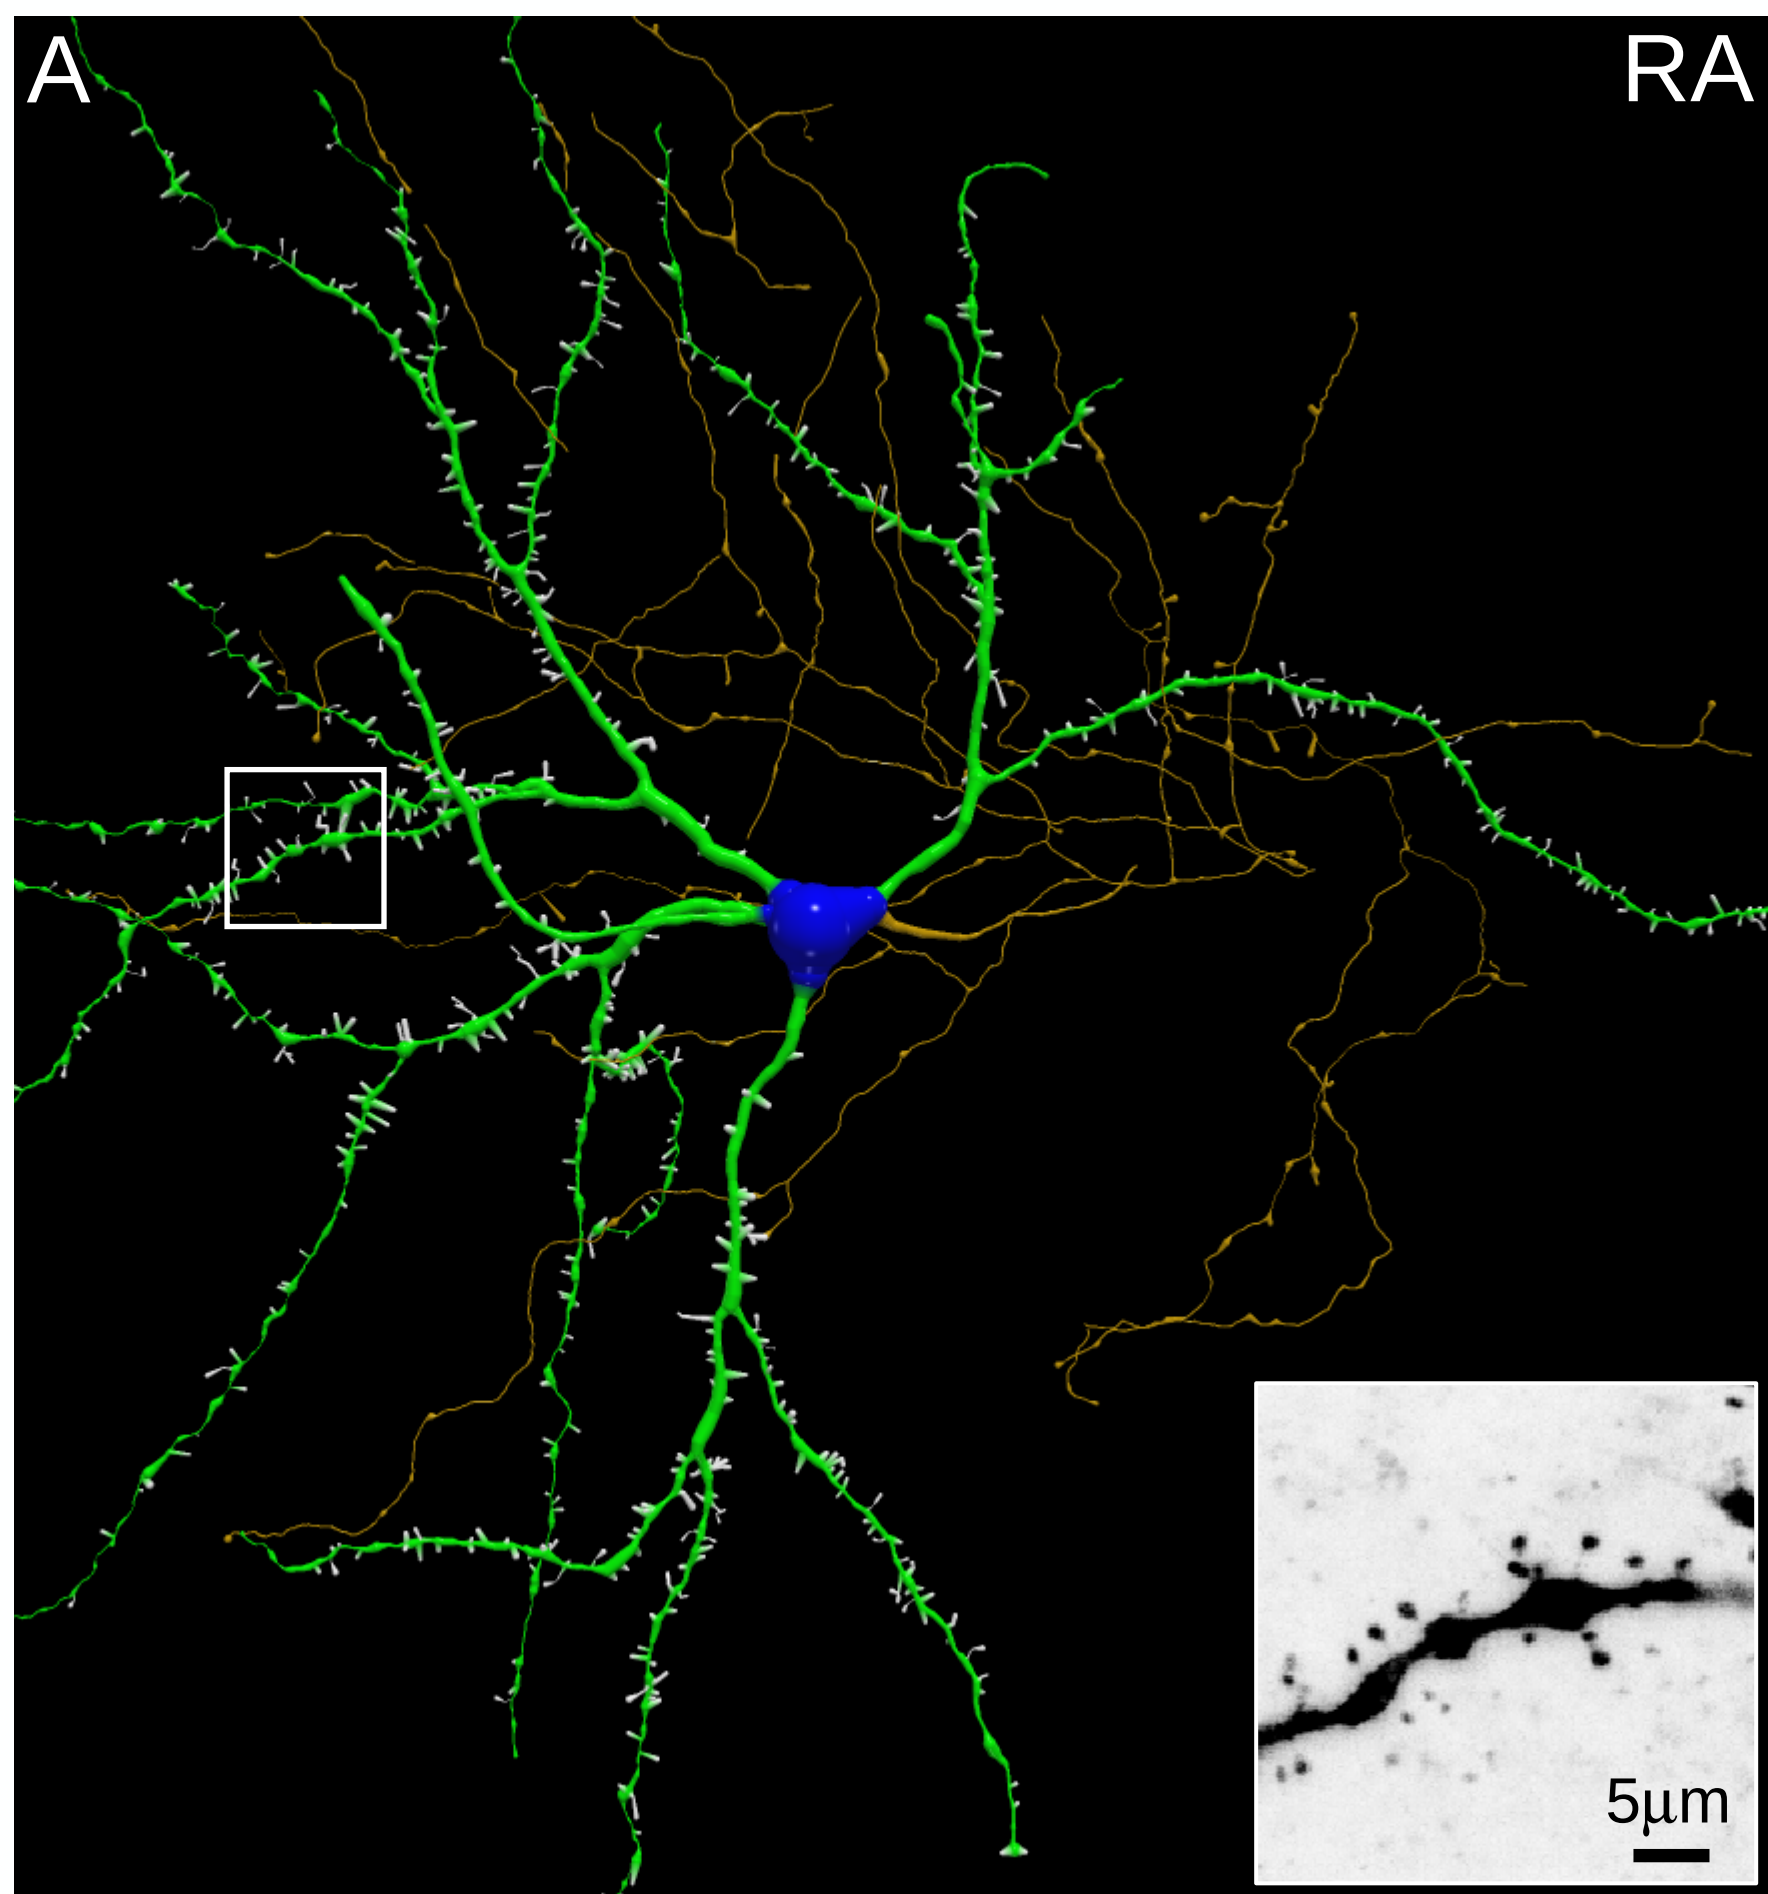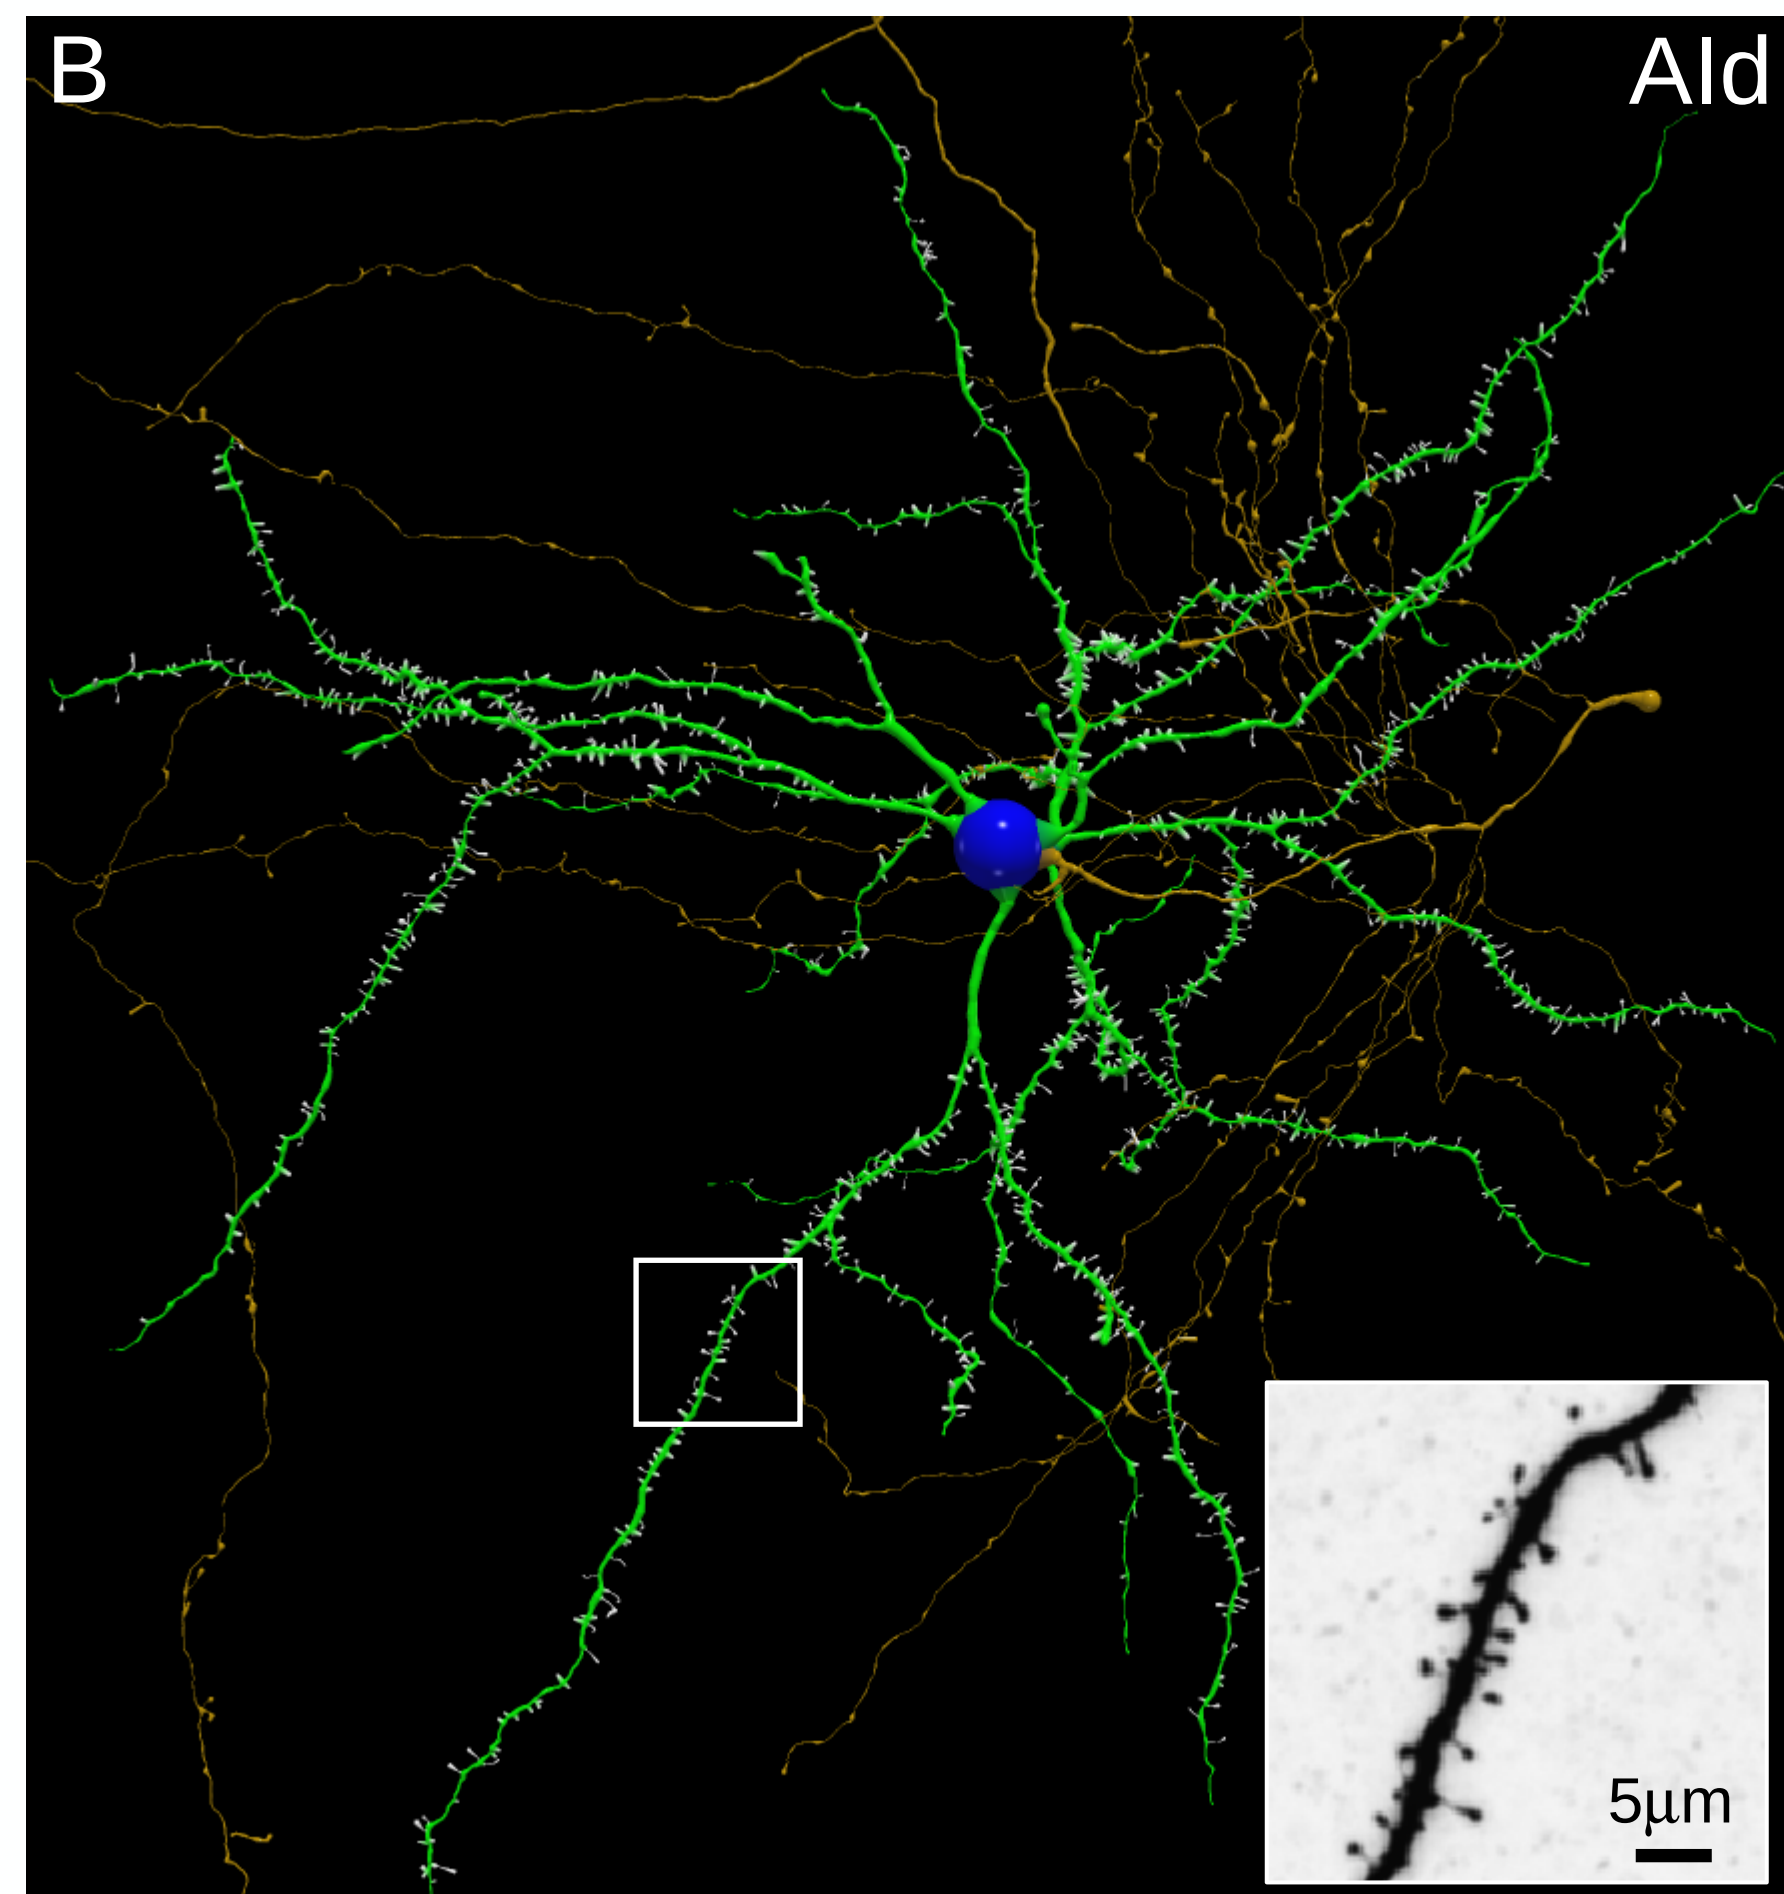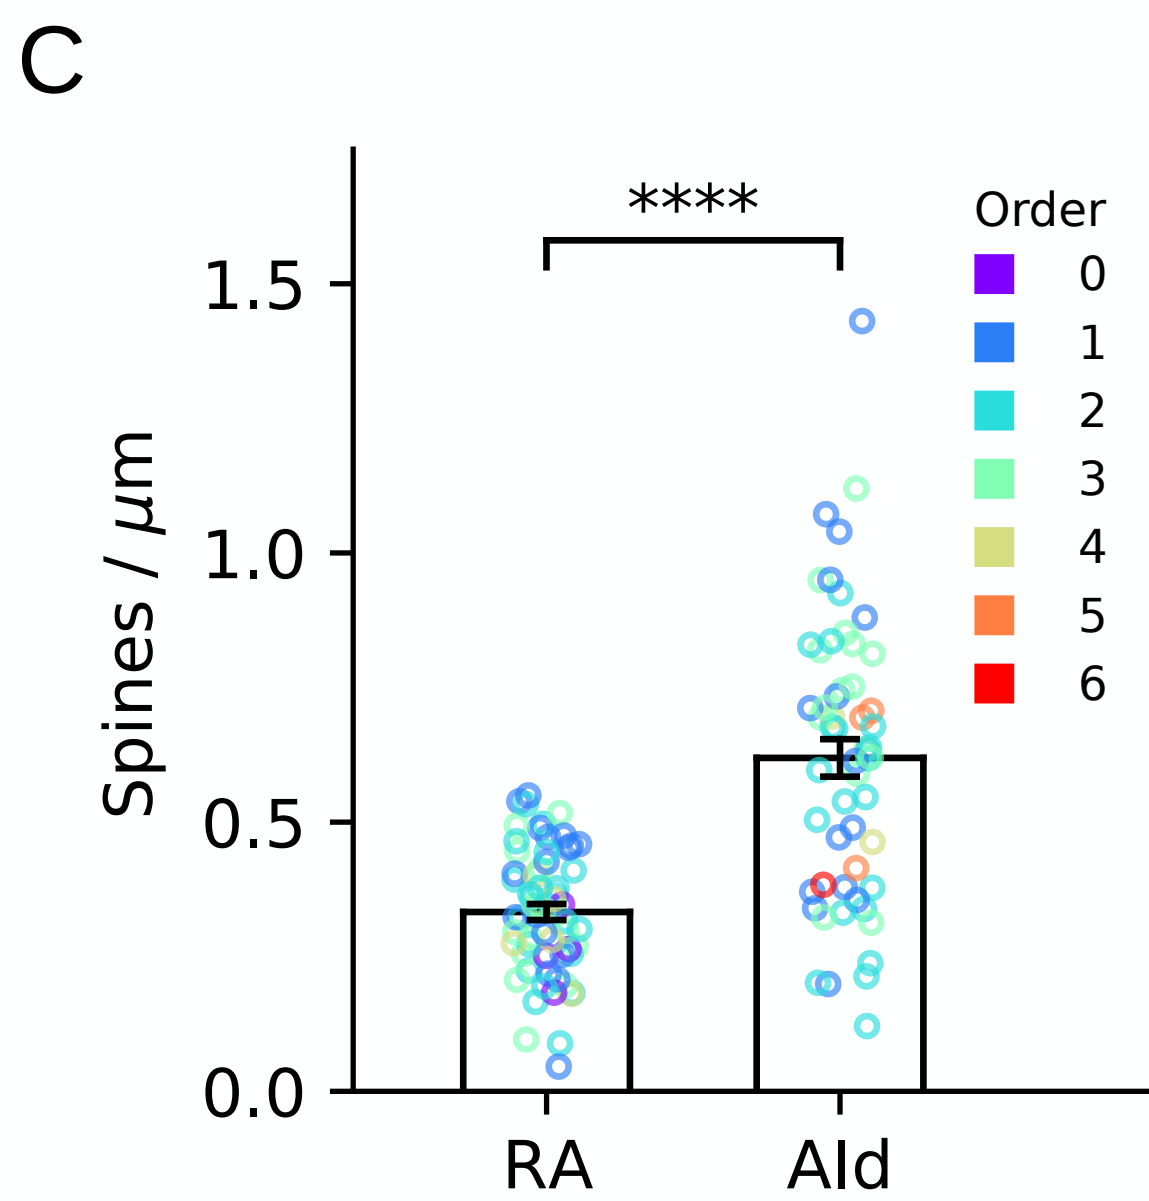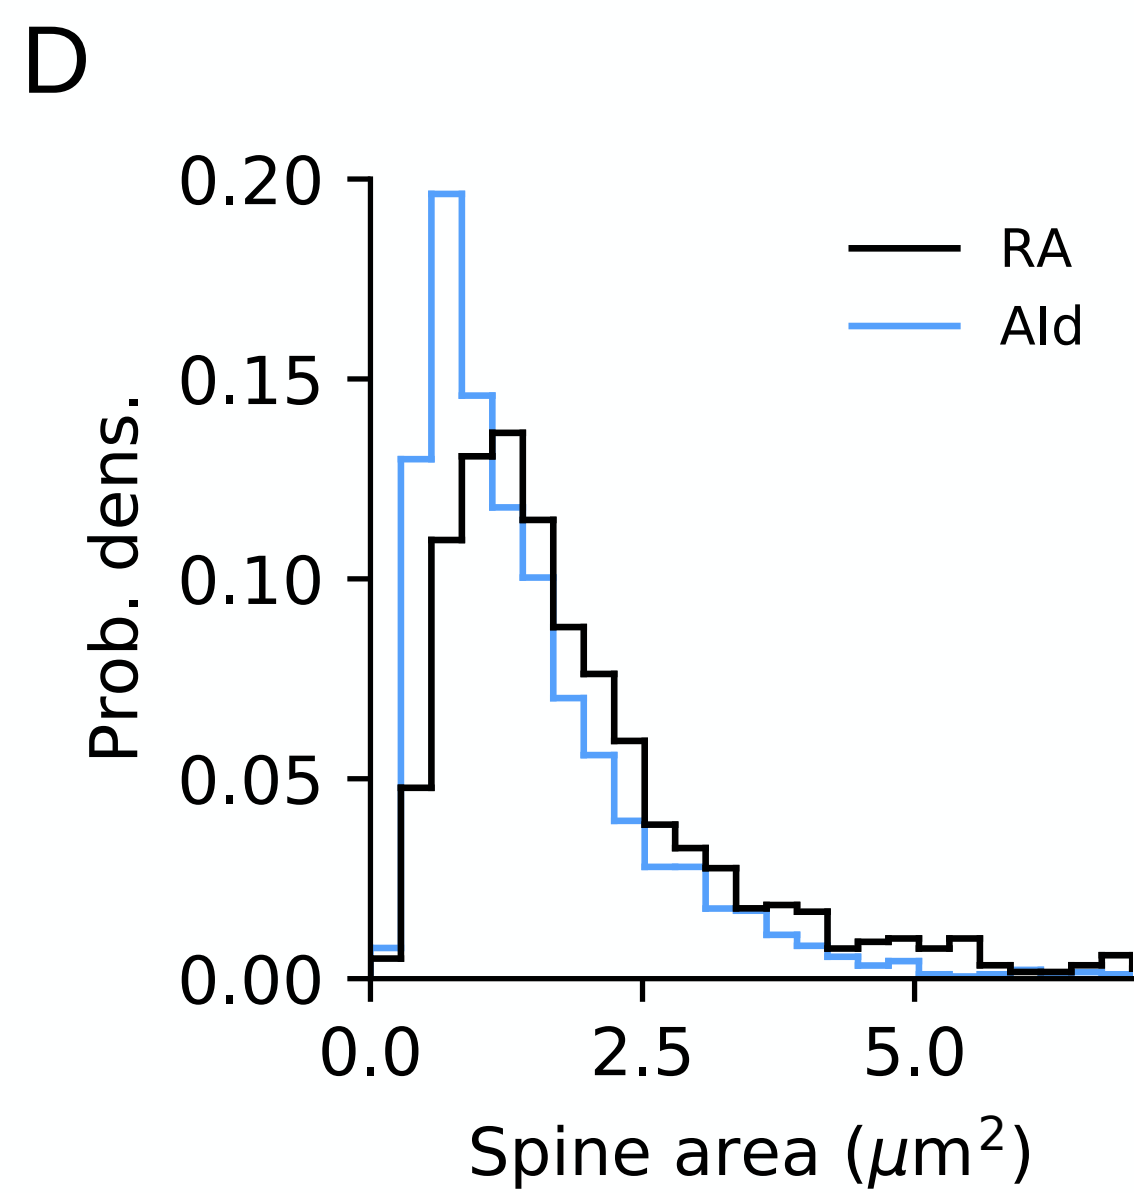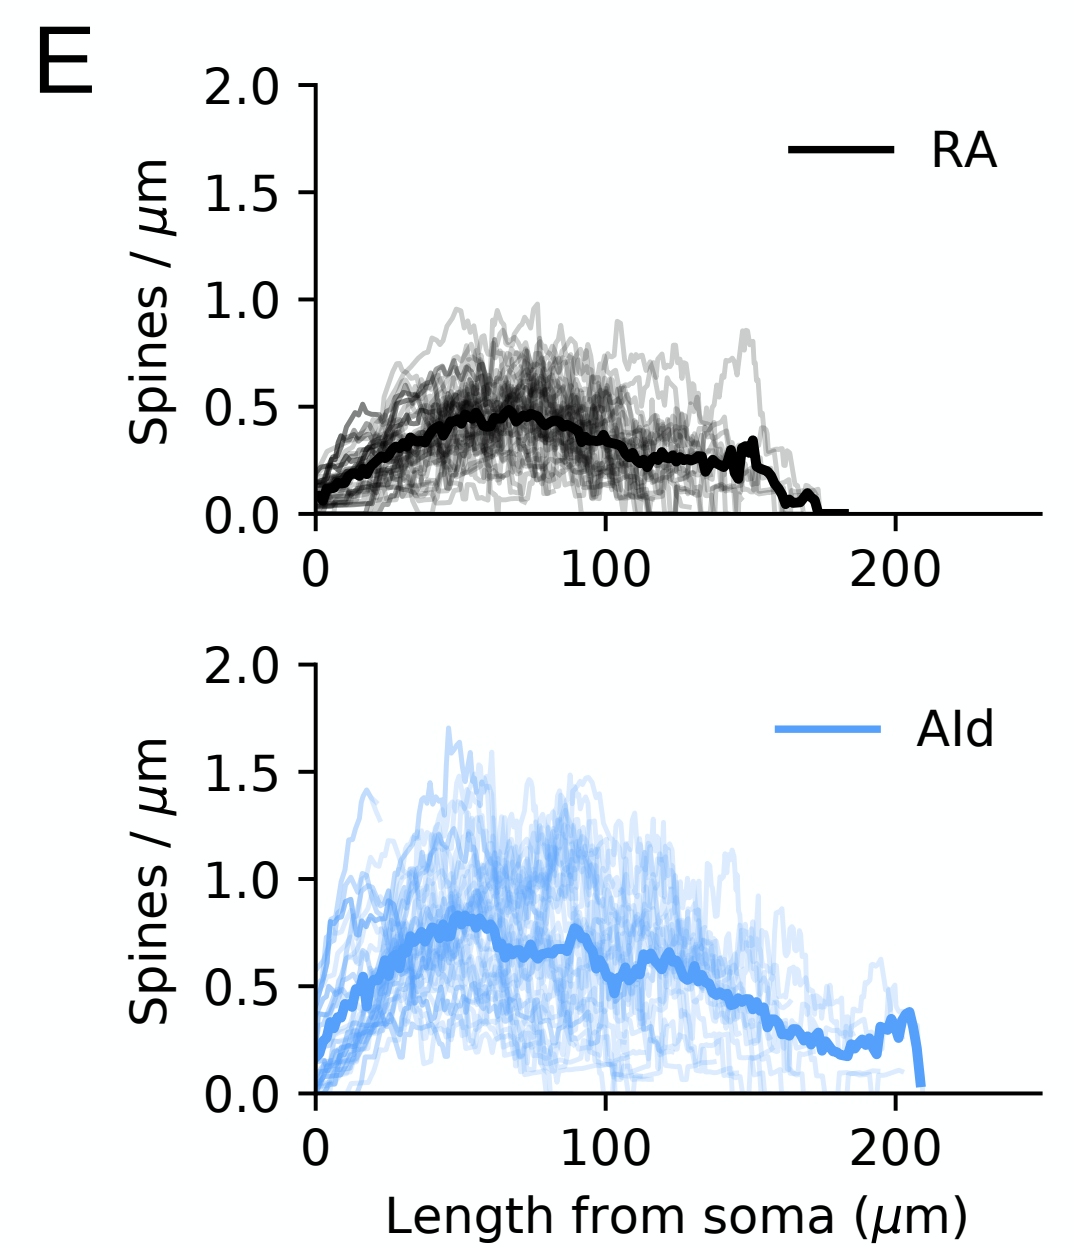

Supplement: supp [file elife-81992-supp-v1.zip]

A

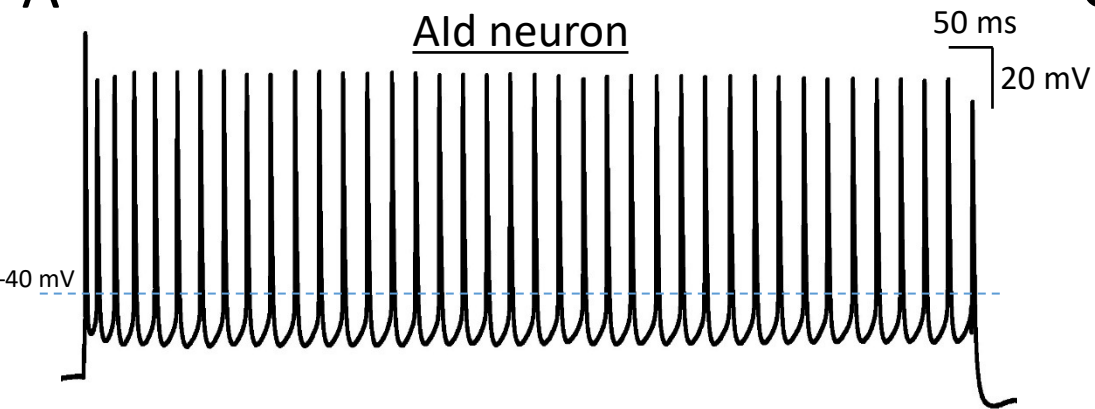

C

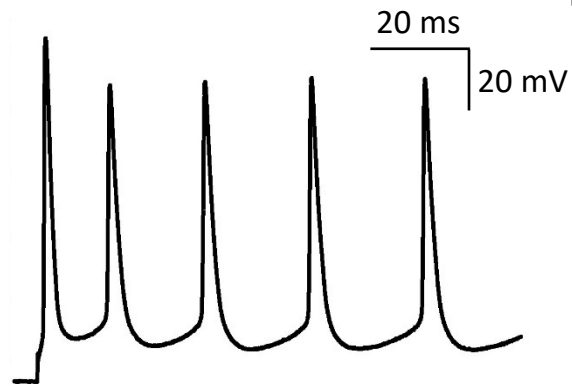

E

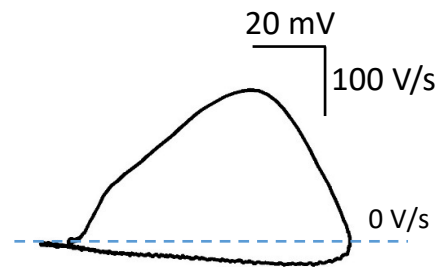

B

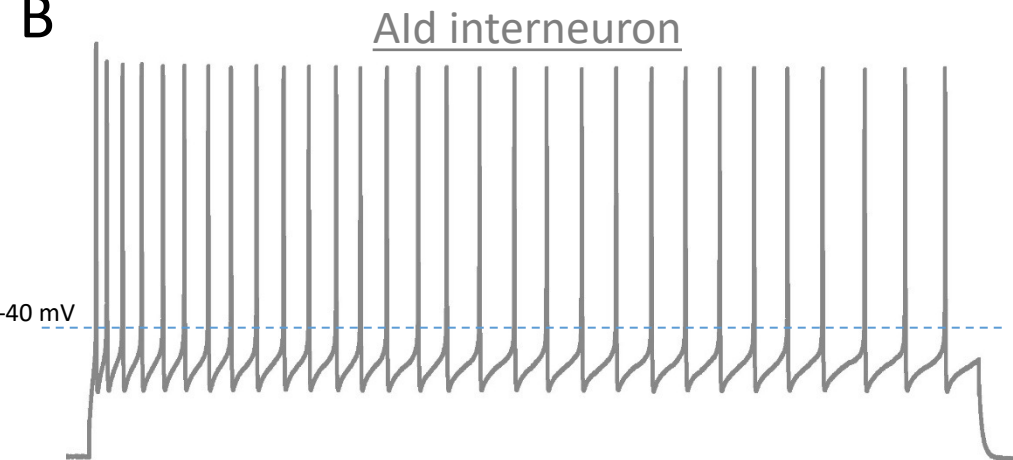

D

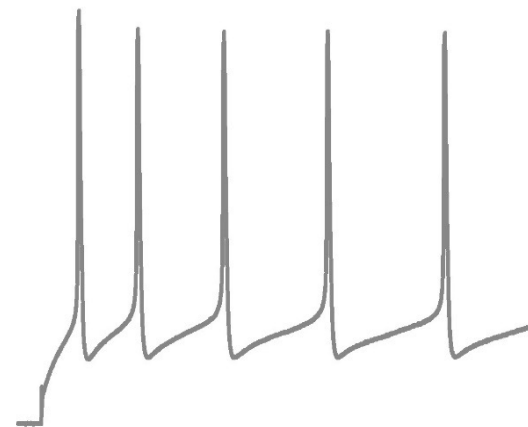

F

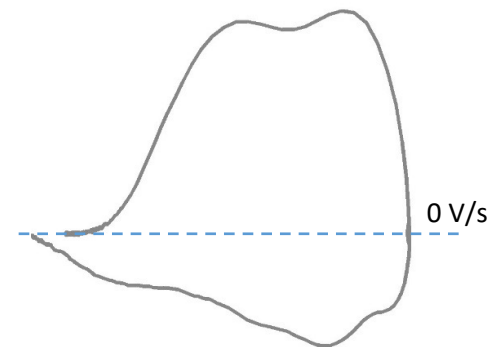

Supplement: supp [file elife-81992-supp-v1.zip › elife_poa_e81992_Figure_2_figure_supplement_1.pdf]

**A**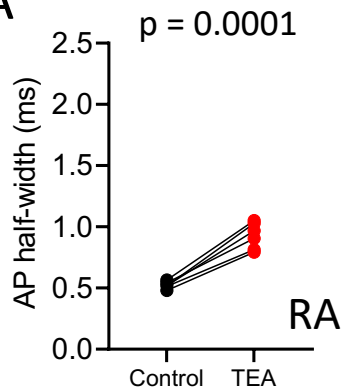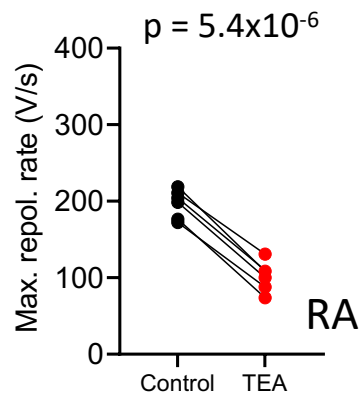**B**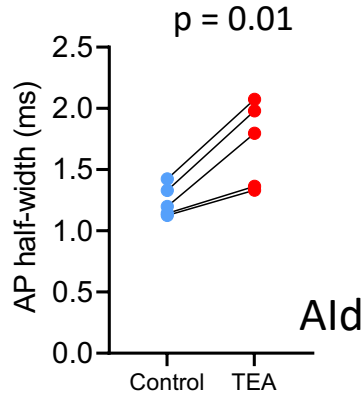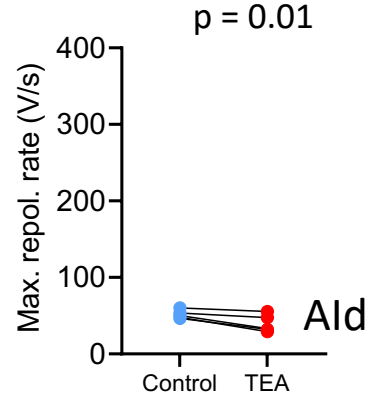**C**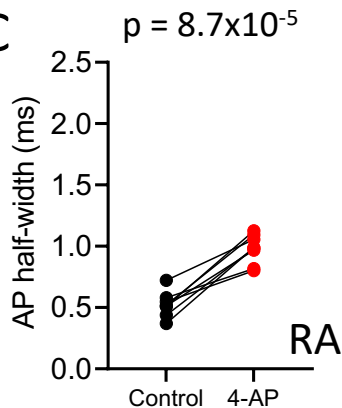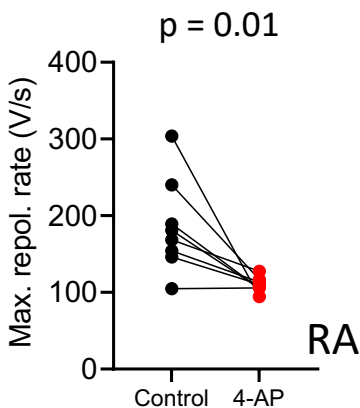**D**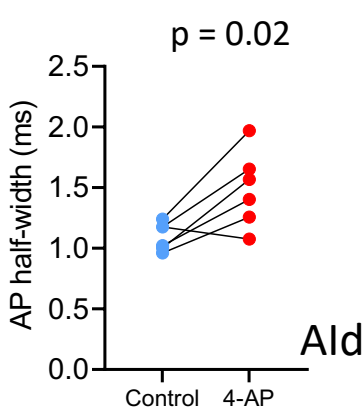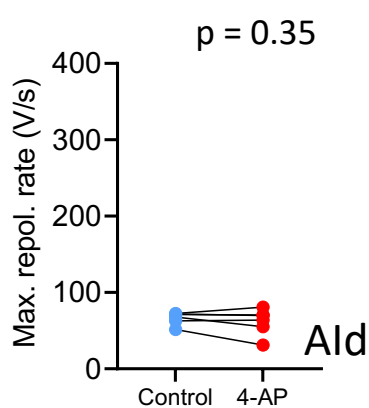

Supplement: supp [file elife-81992-supp-v1.zip › elife_poa_e81992_Figure_4_figure_supplement_1.pdf]

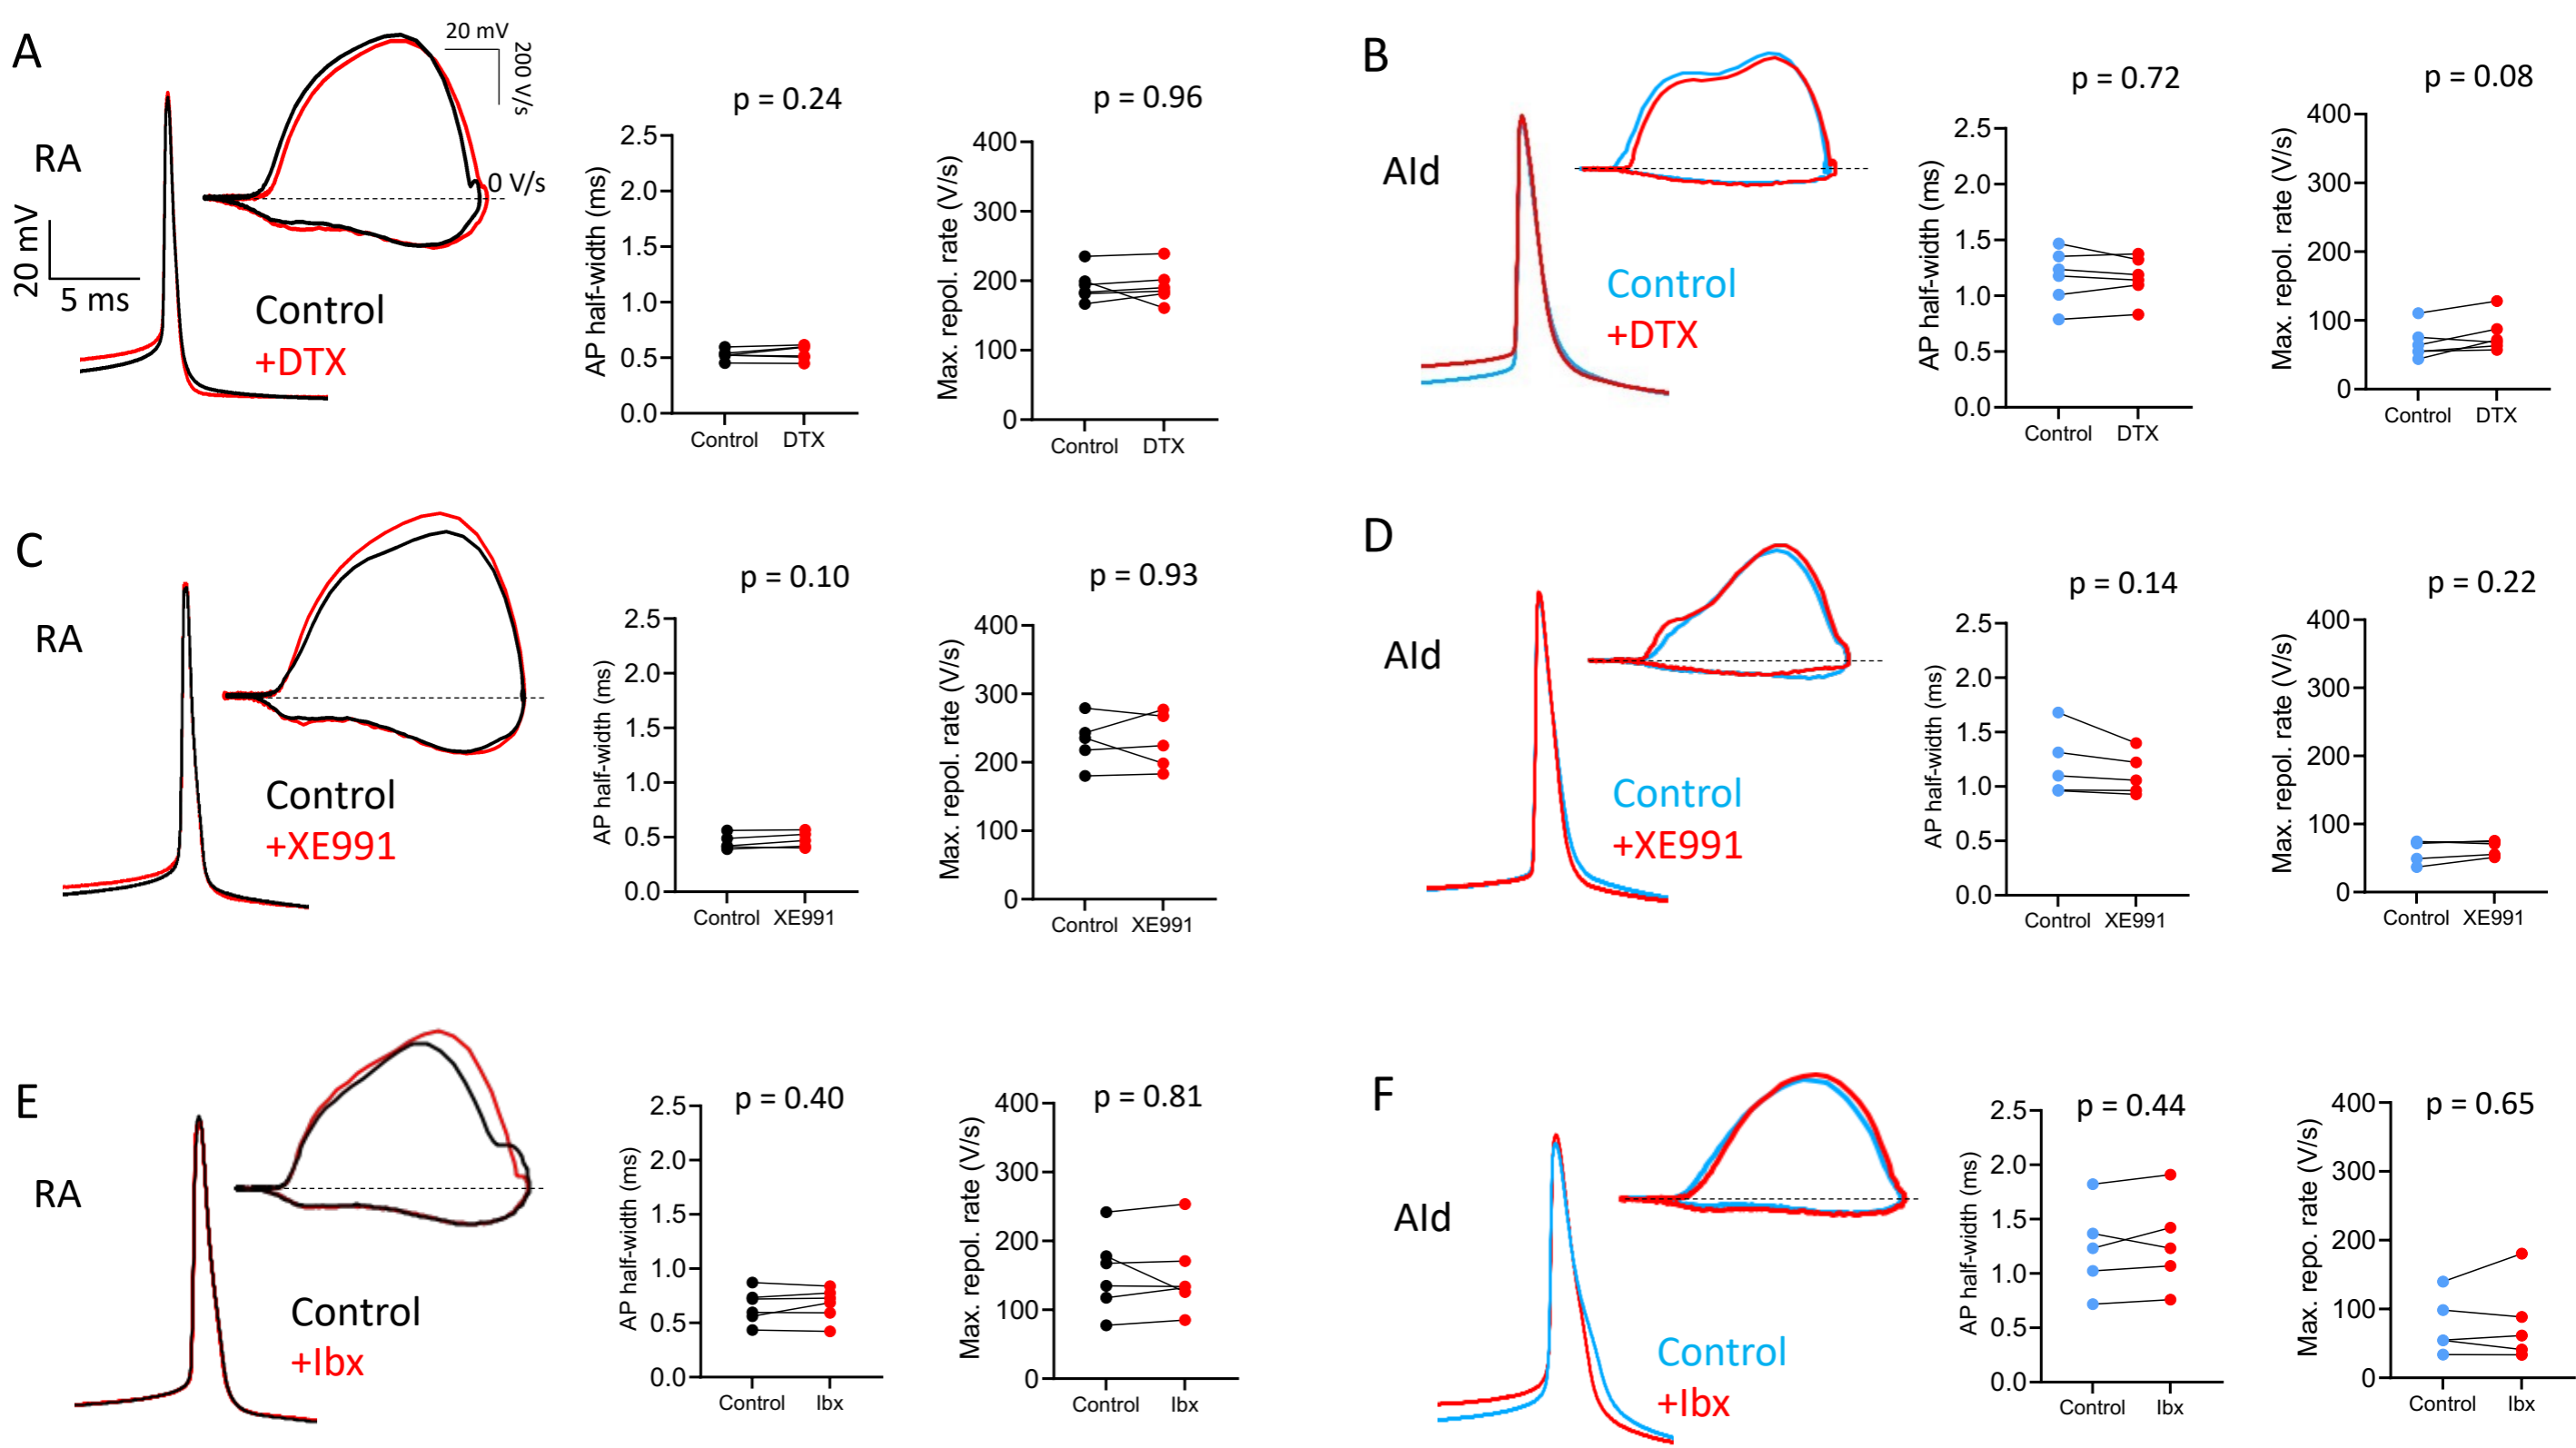

Supplement: supp [file elife-81992-supp-v1.zip › elife_poa_e81992_Figure_4_figure_supplement_2.pdf]

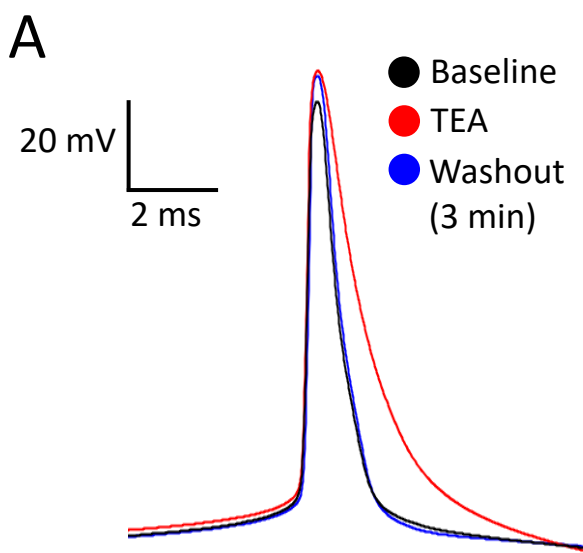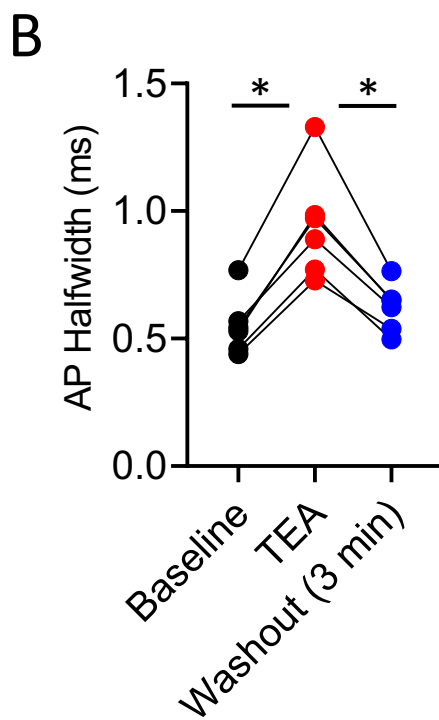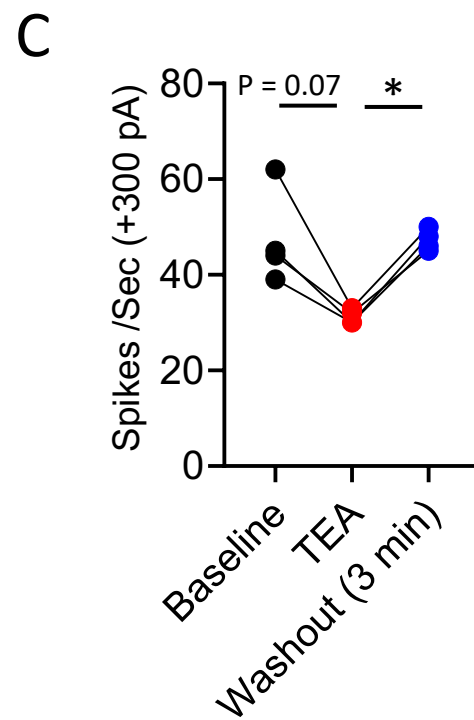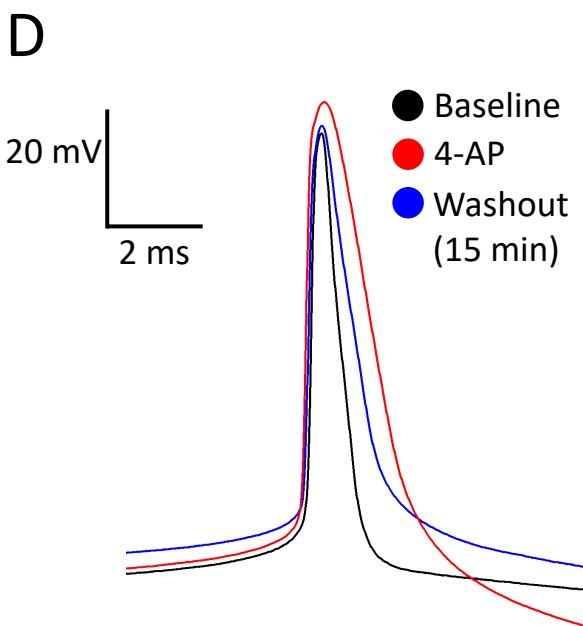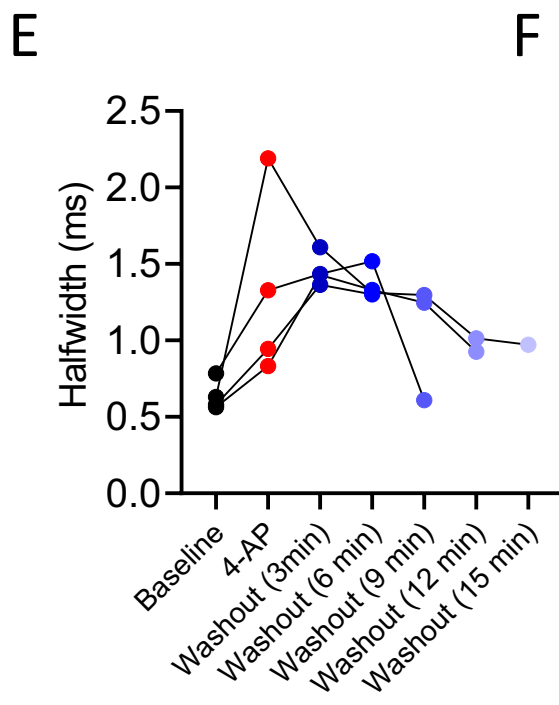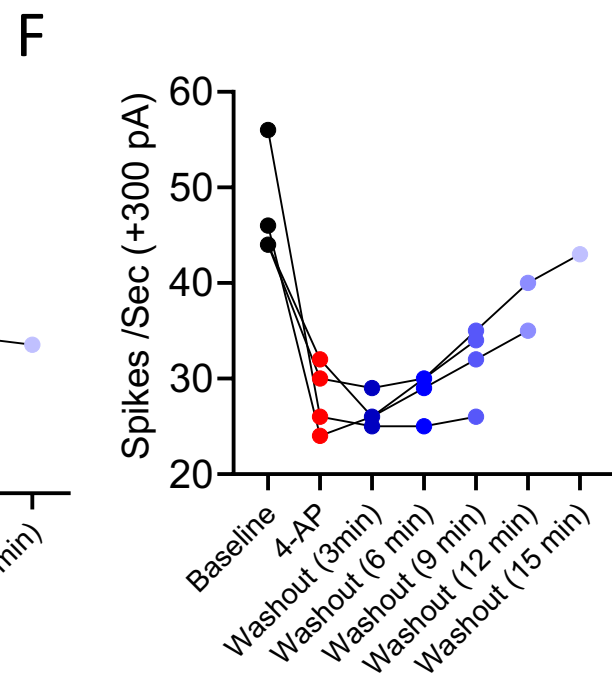

Supplement: supp [file elife-81992-supp-v1.zip › elife_poa_e81992_Figure_5_figure_supplement_1.pdf]

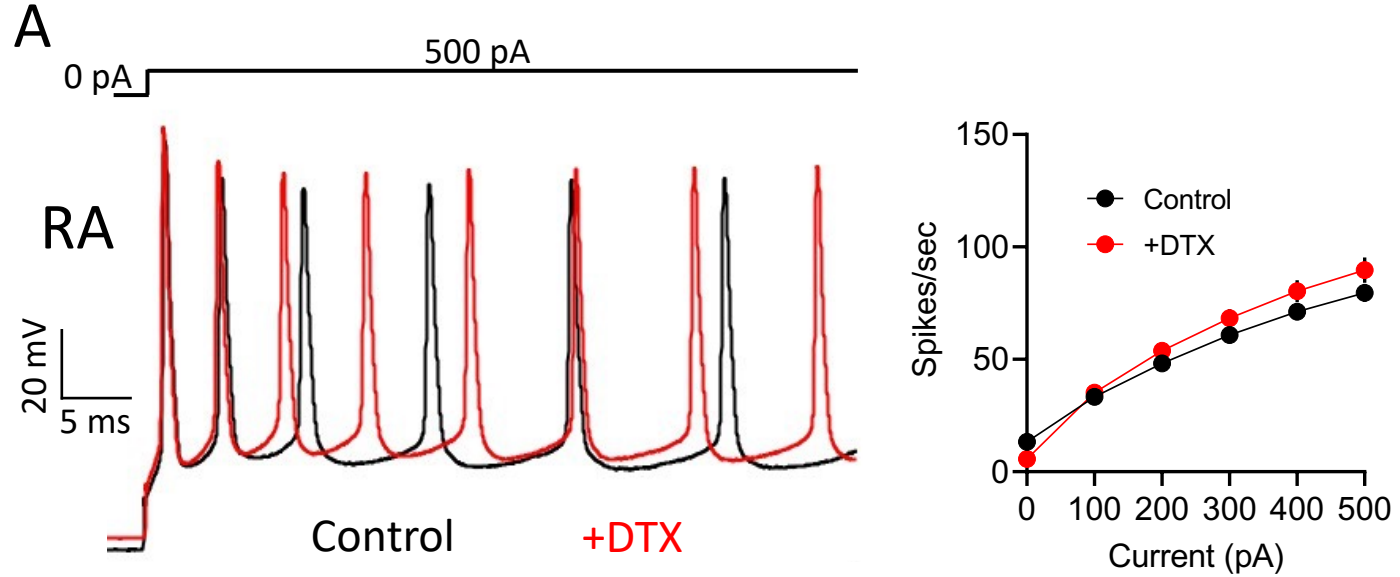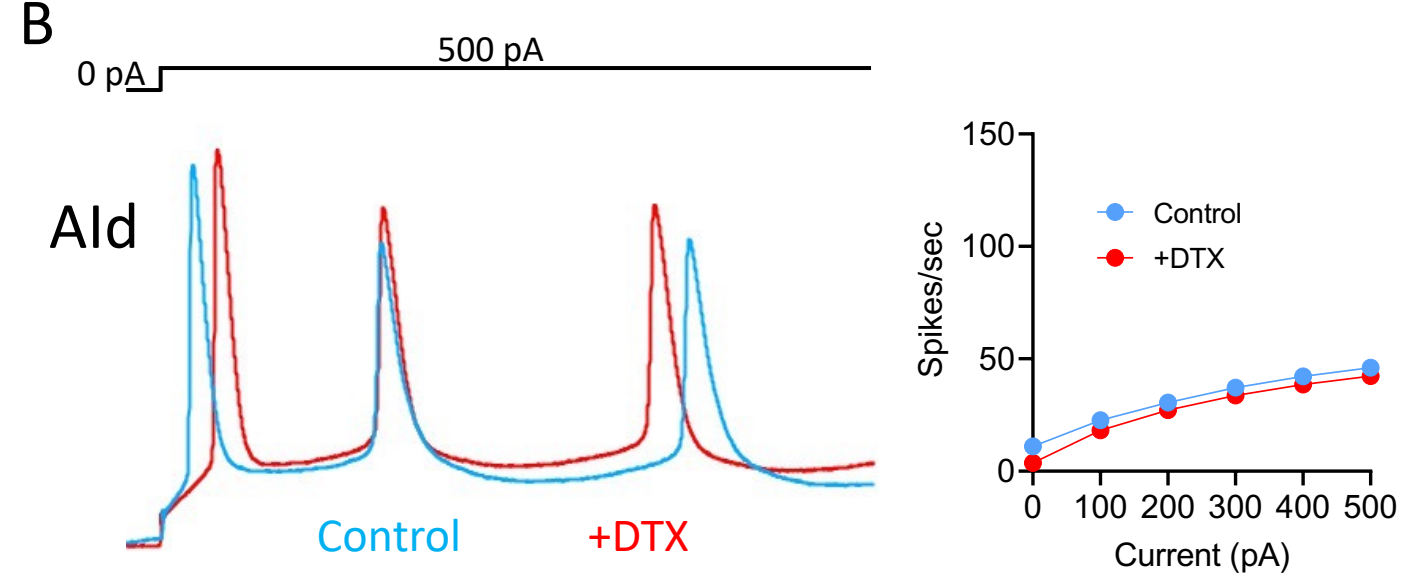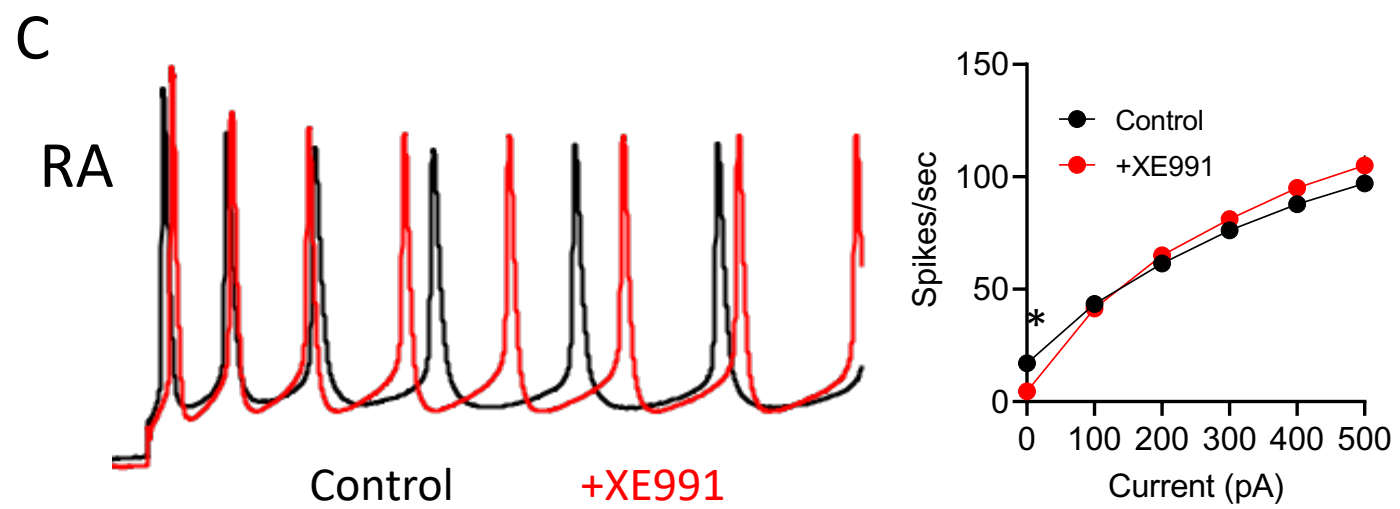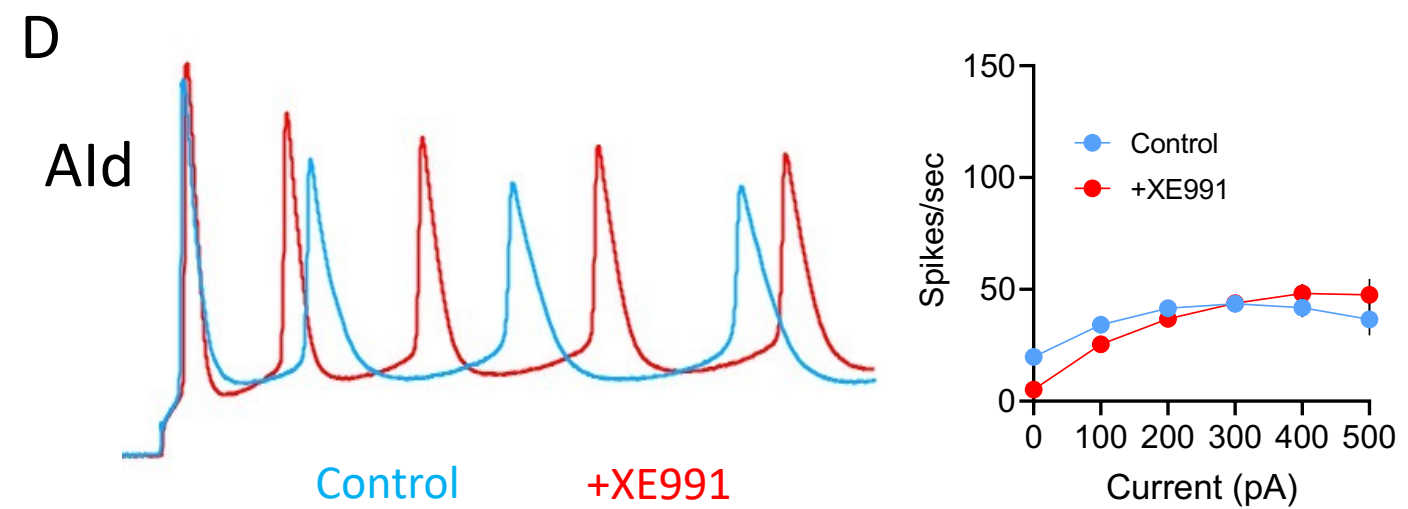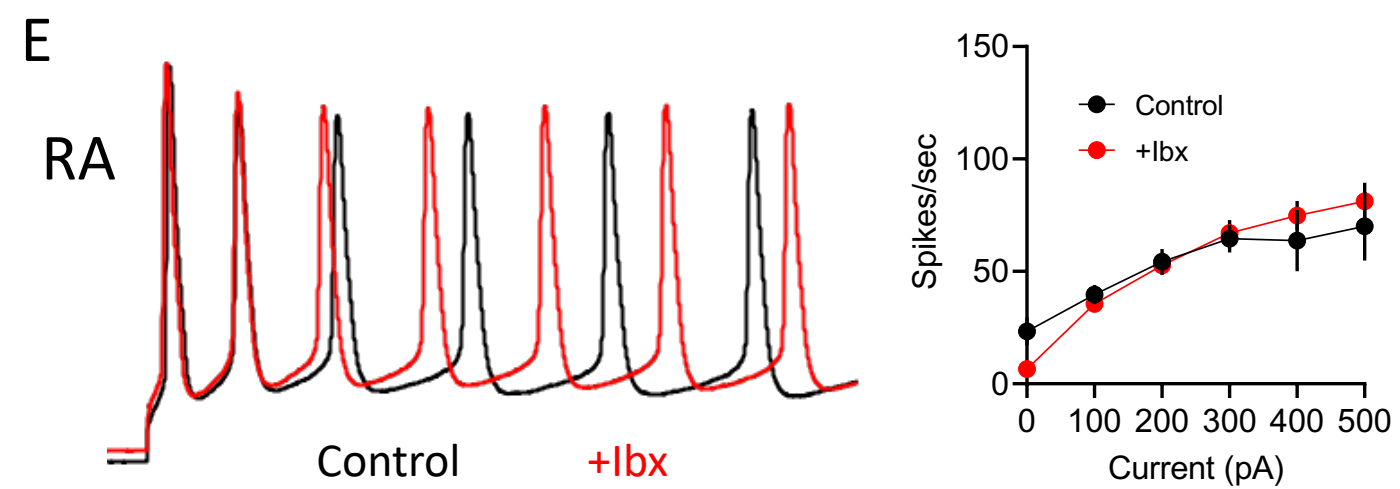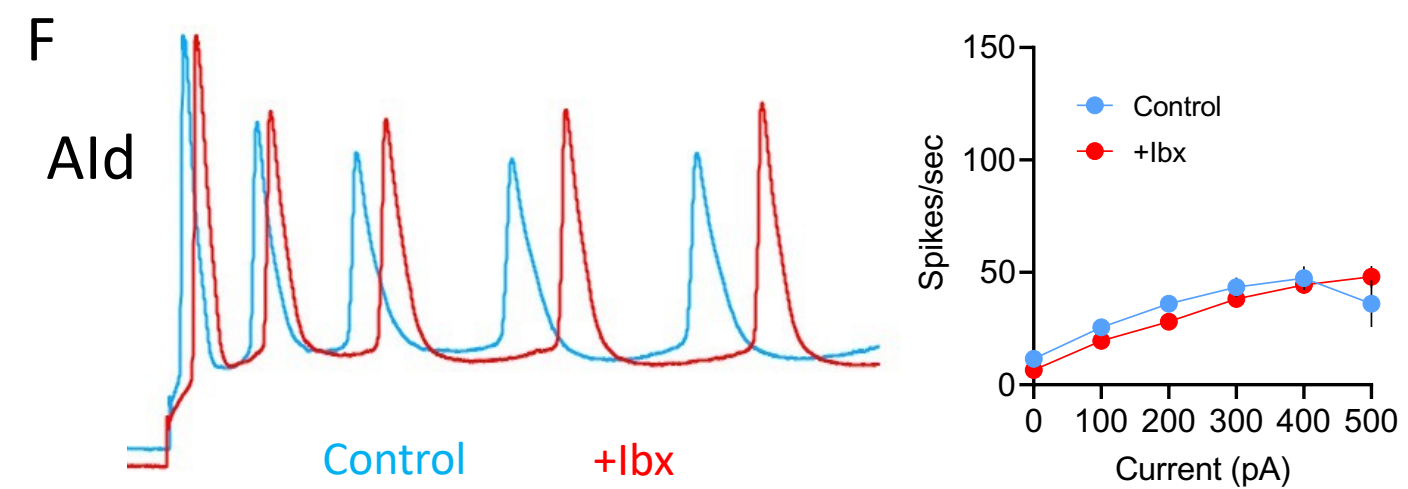

Supplement: supp [file elife-81992-supp-v1.zip › elife_poa_e81992_Figure_5_figure_supplement_2.pdf]

**A**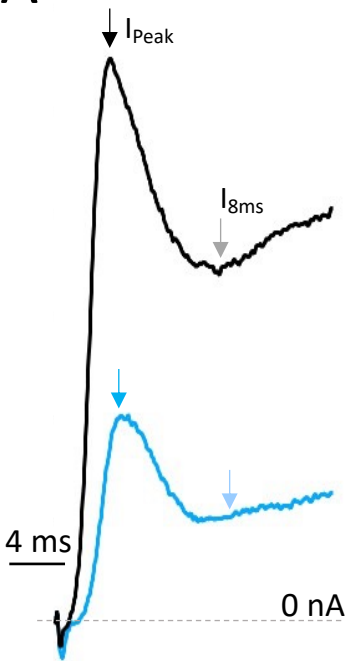**B**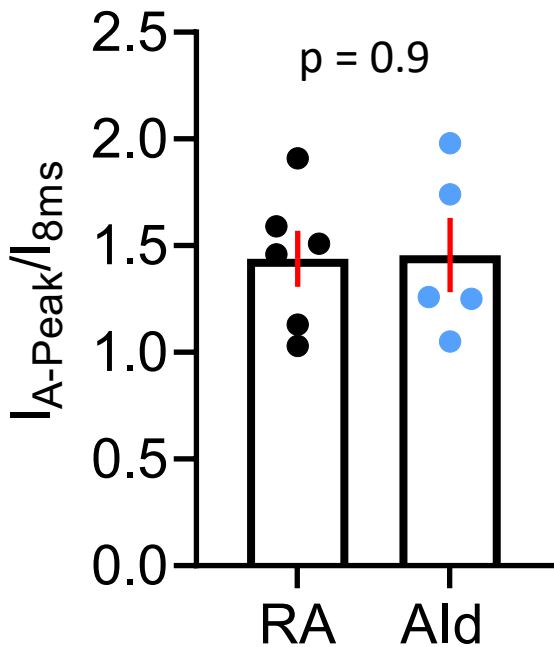

Supplement: supp [file elife-81992-supp-v1.zip › elife_poa_e81992_Figure_6_figure_supplement_1.pdf]

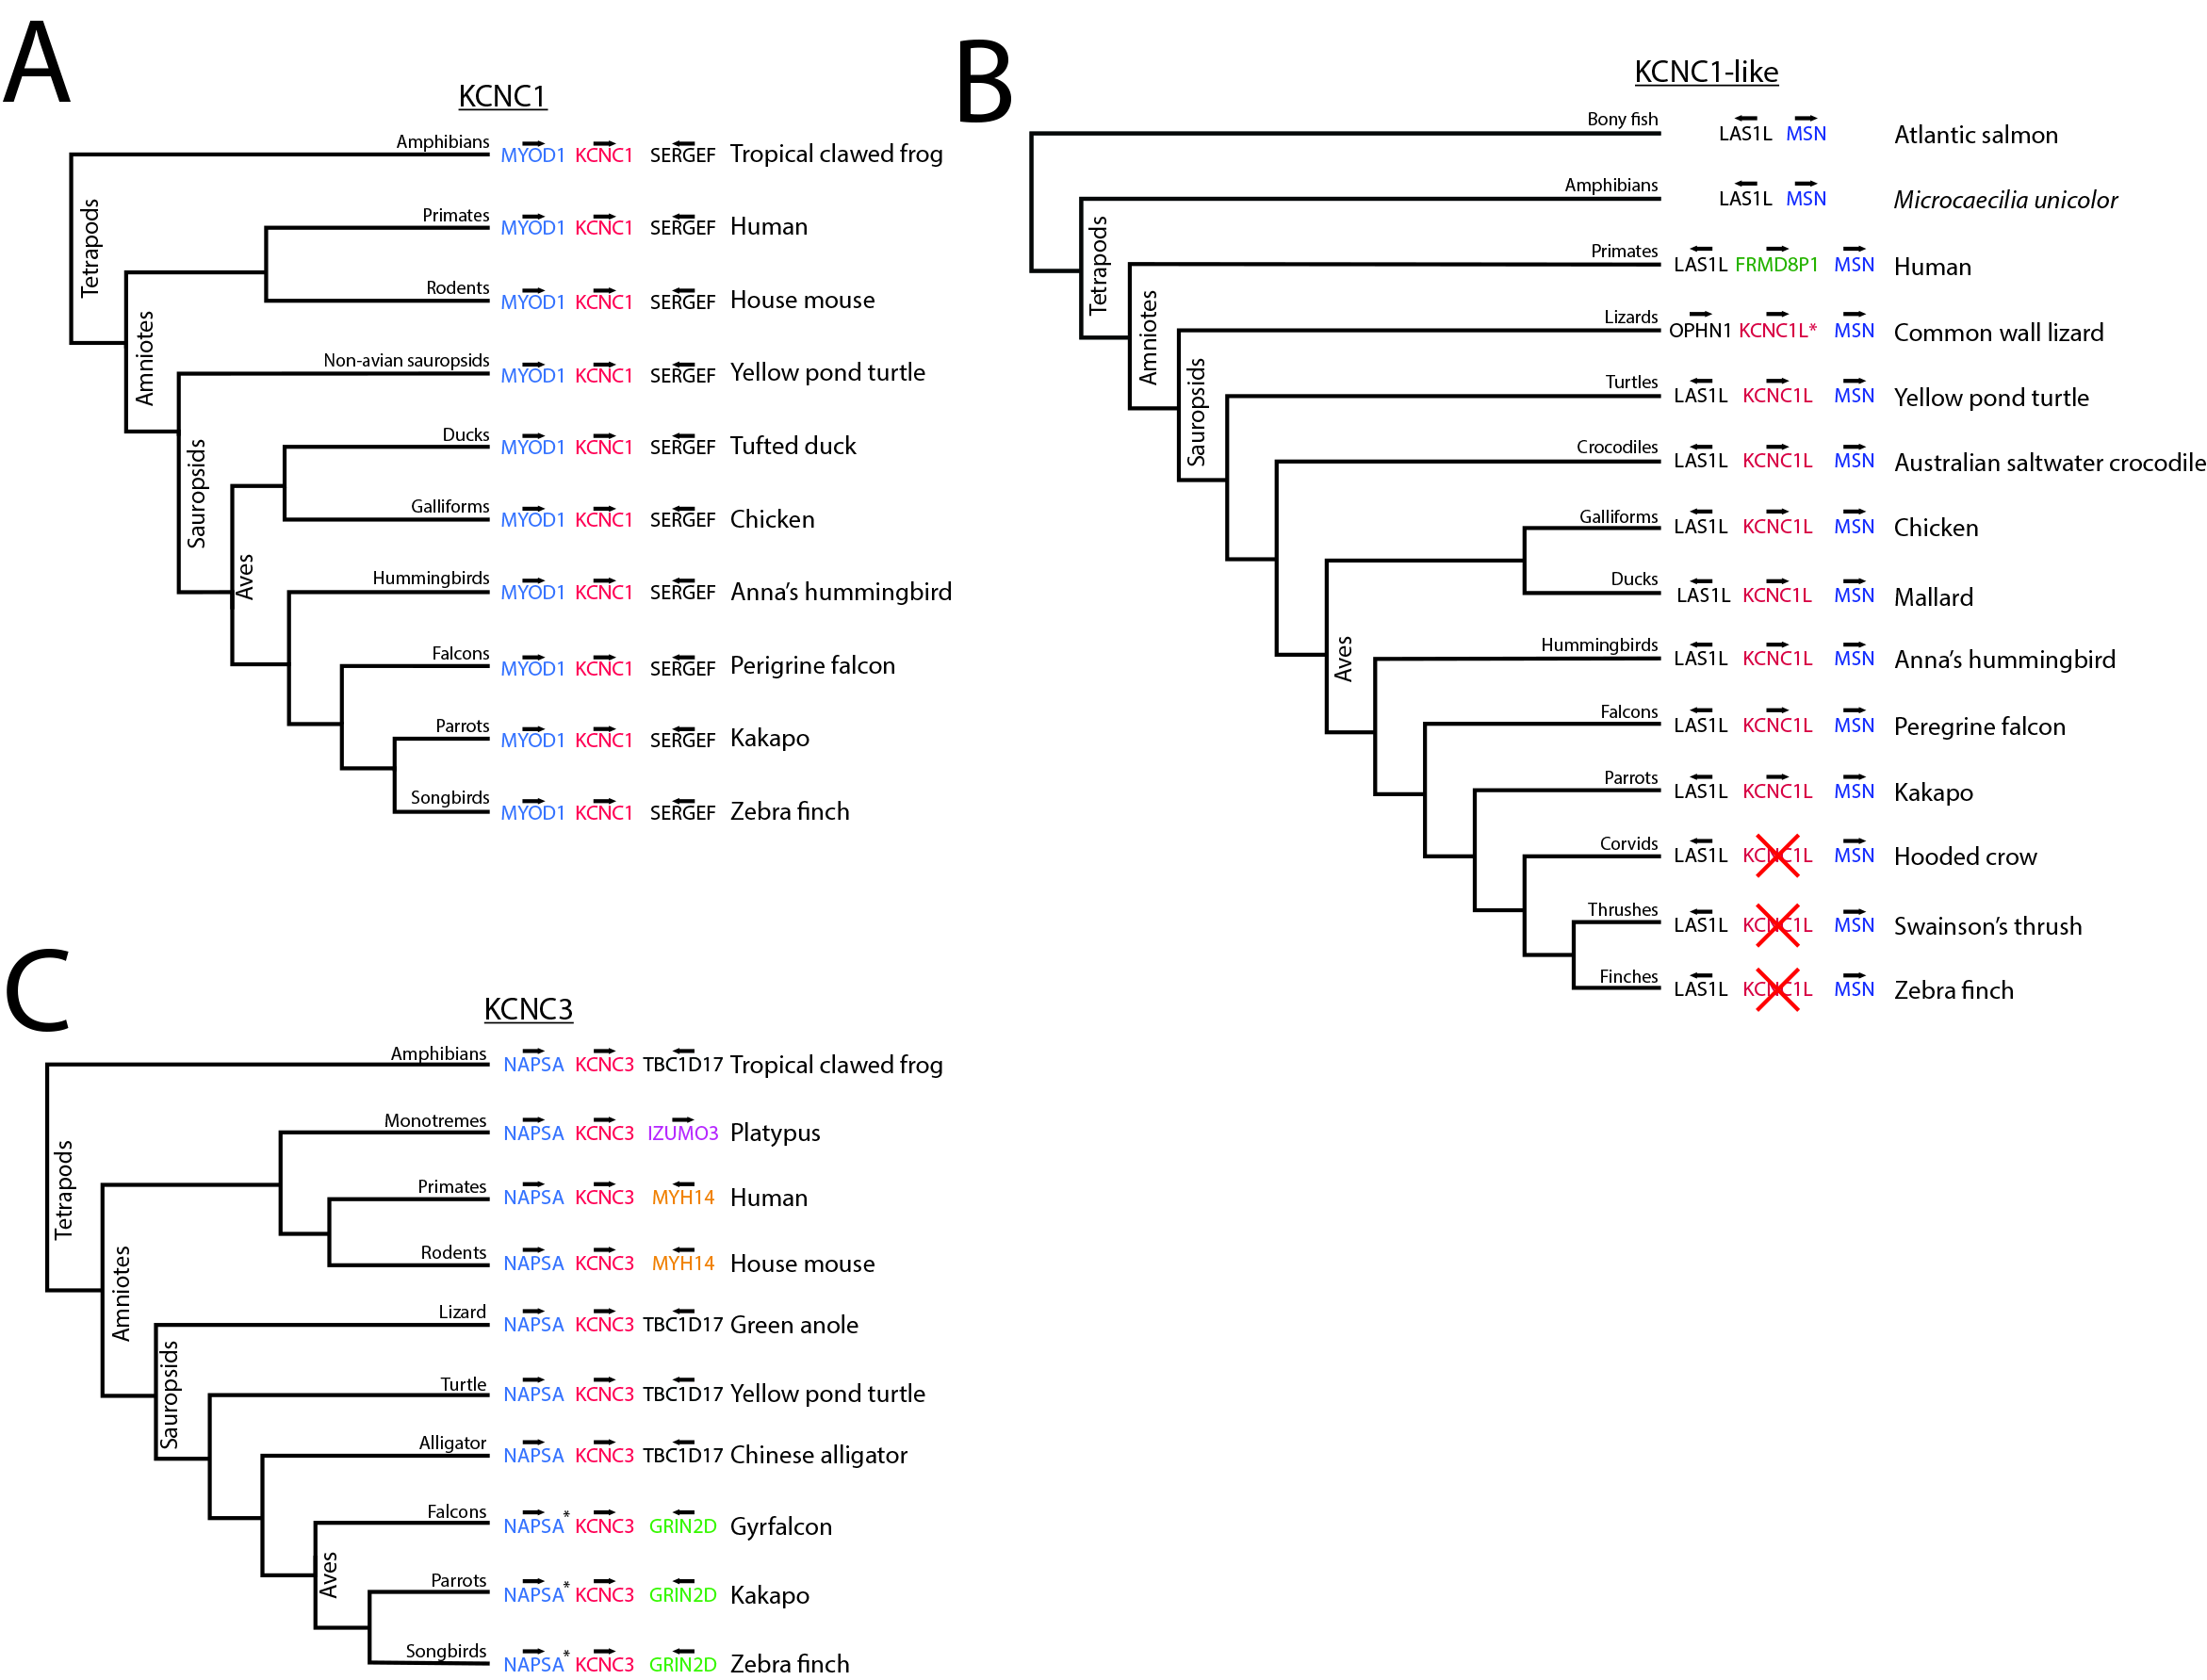

Supplement: supp [file elife-81992-supp-v1.zip › elife_poa_e81992_Figure_7_figure_supplement_1.tif]

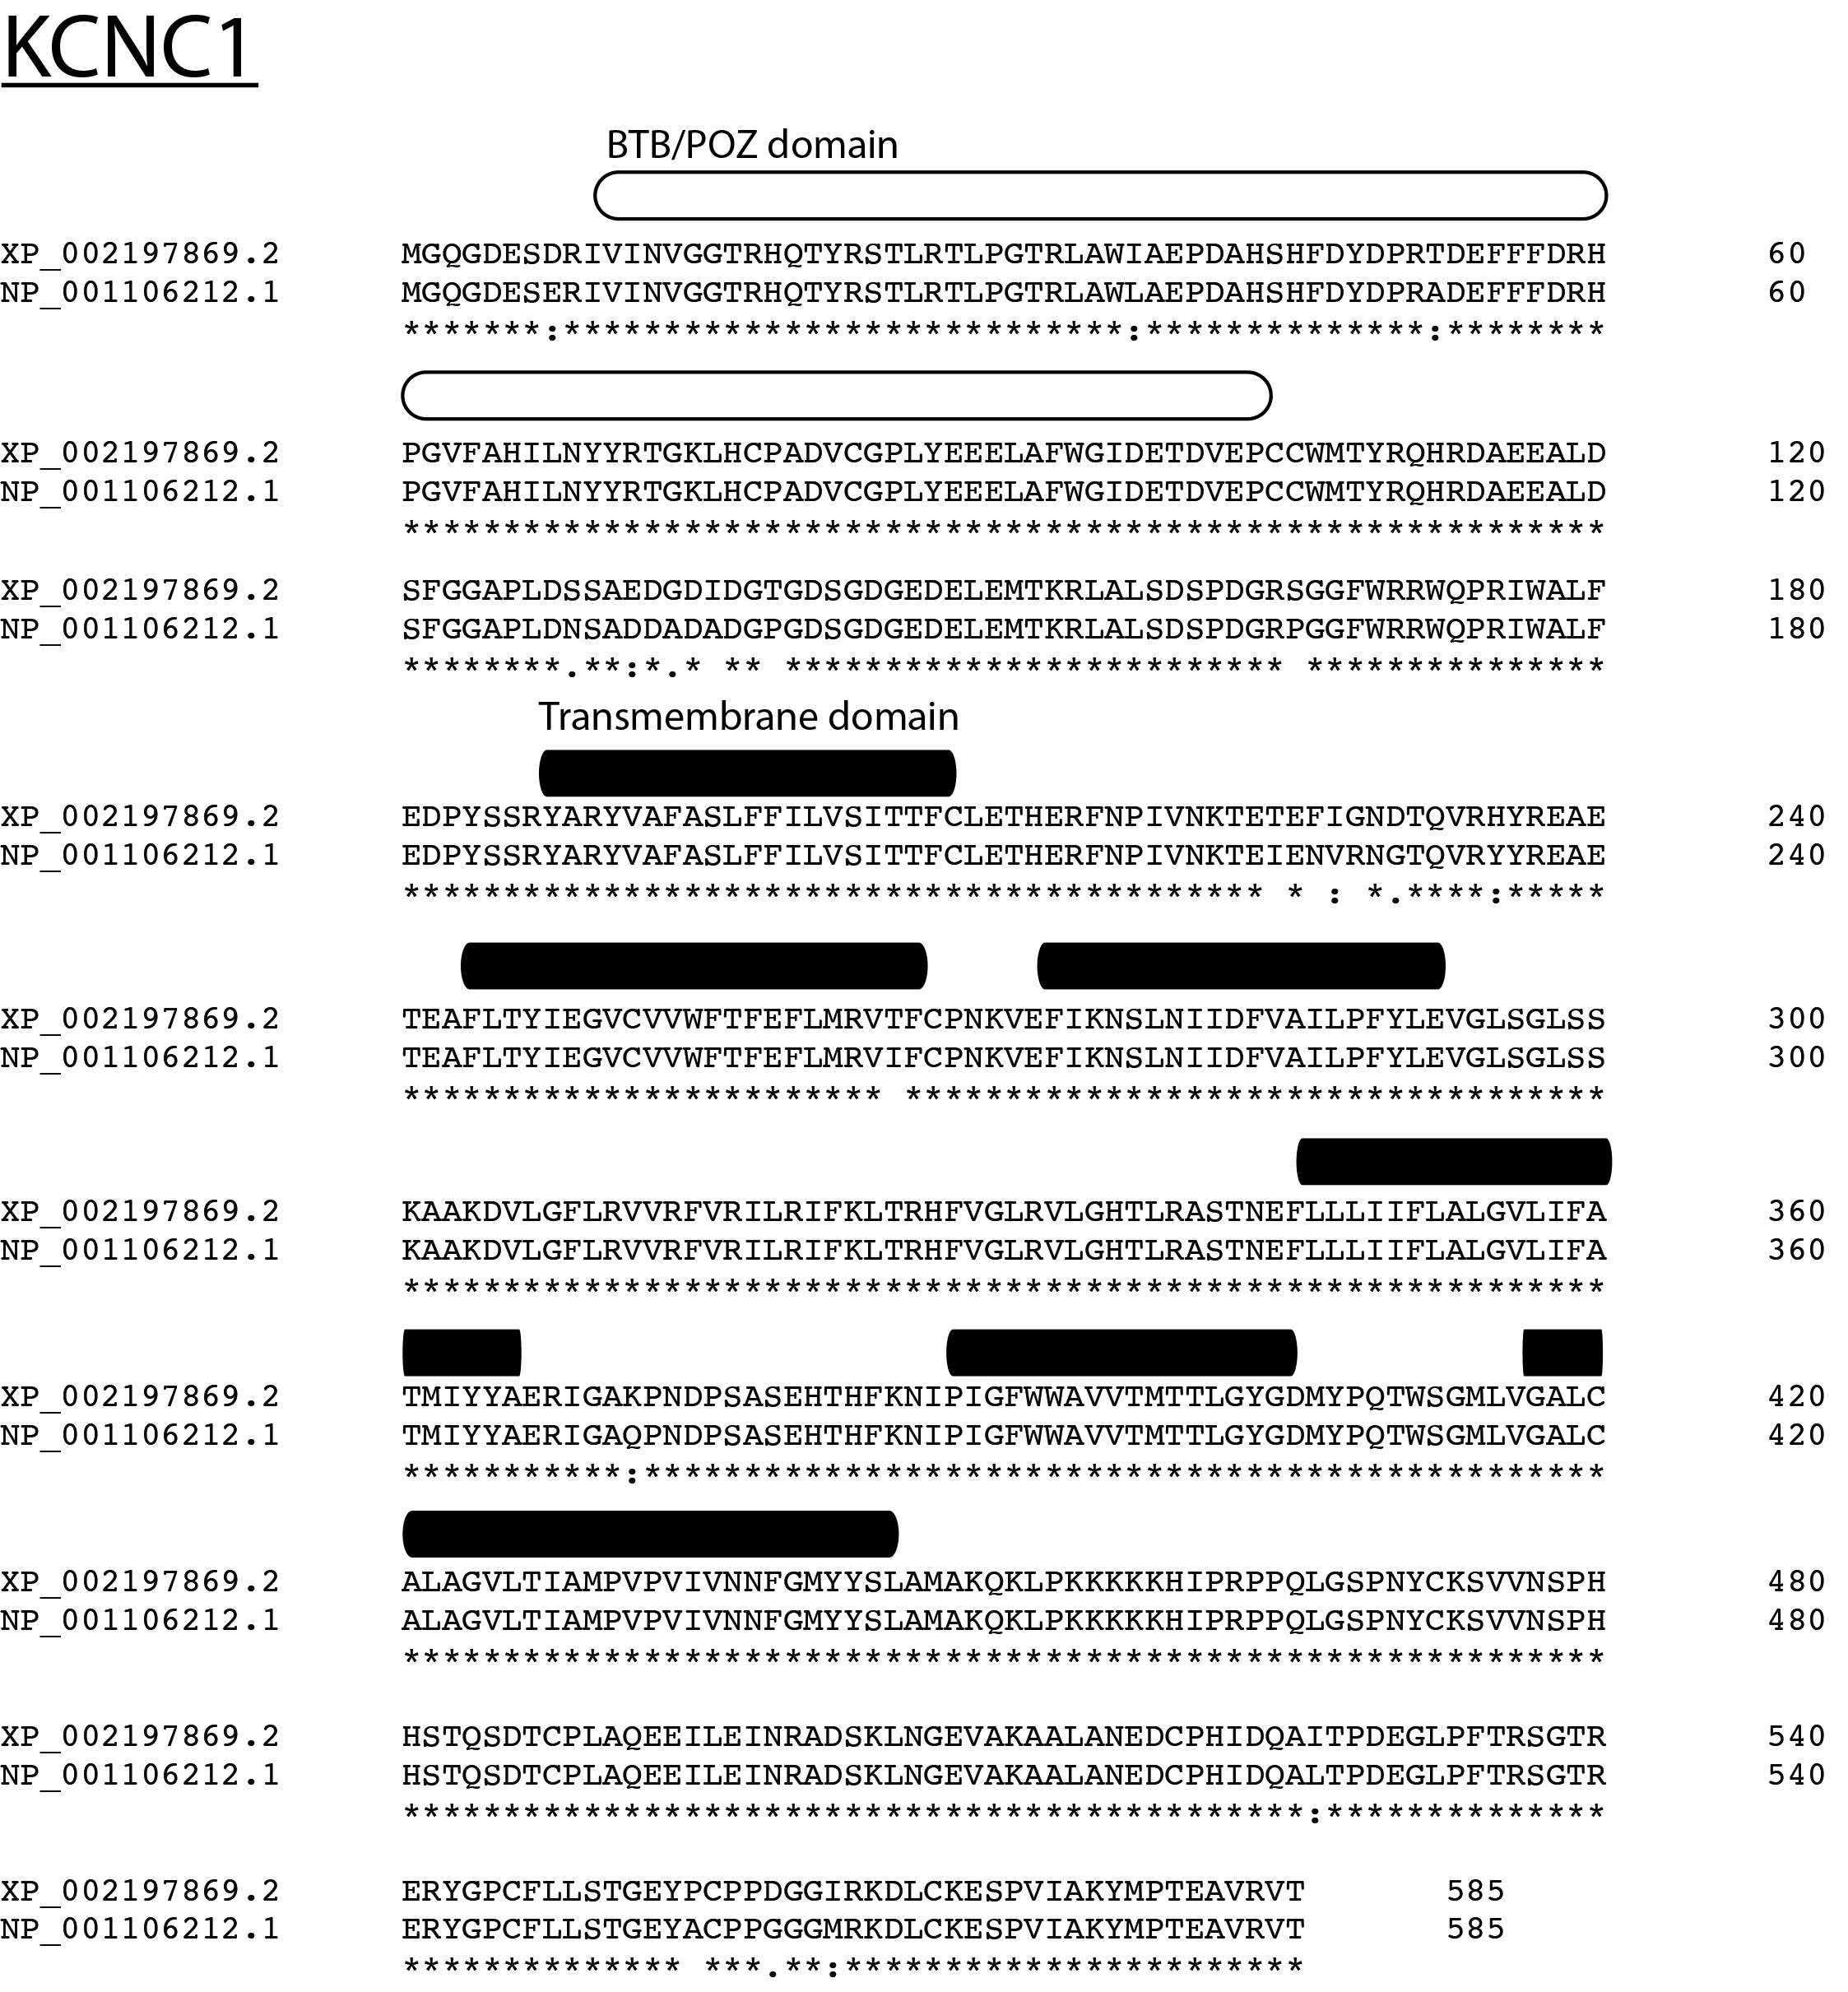

Supplement: supp [file elife-81992-supp-v1.zip › elife_poa_e81992_Figure_7_figure_supplement_2.tif]

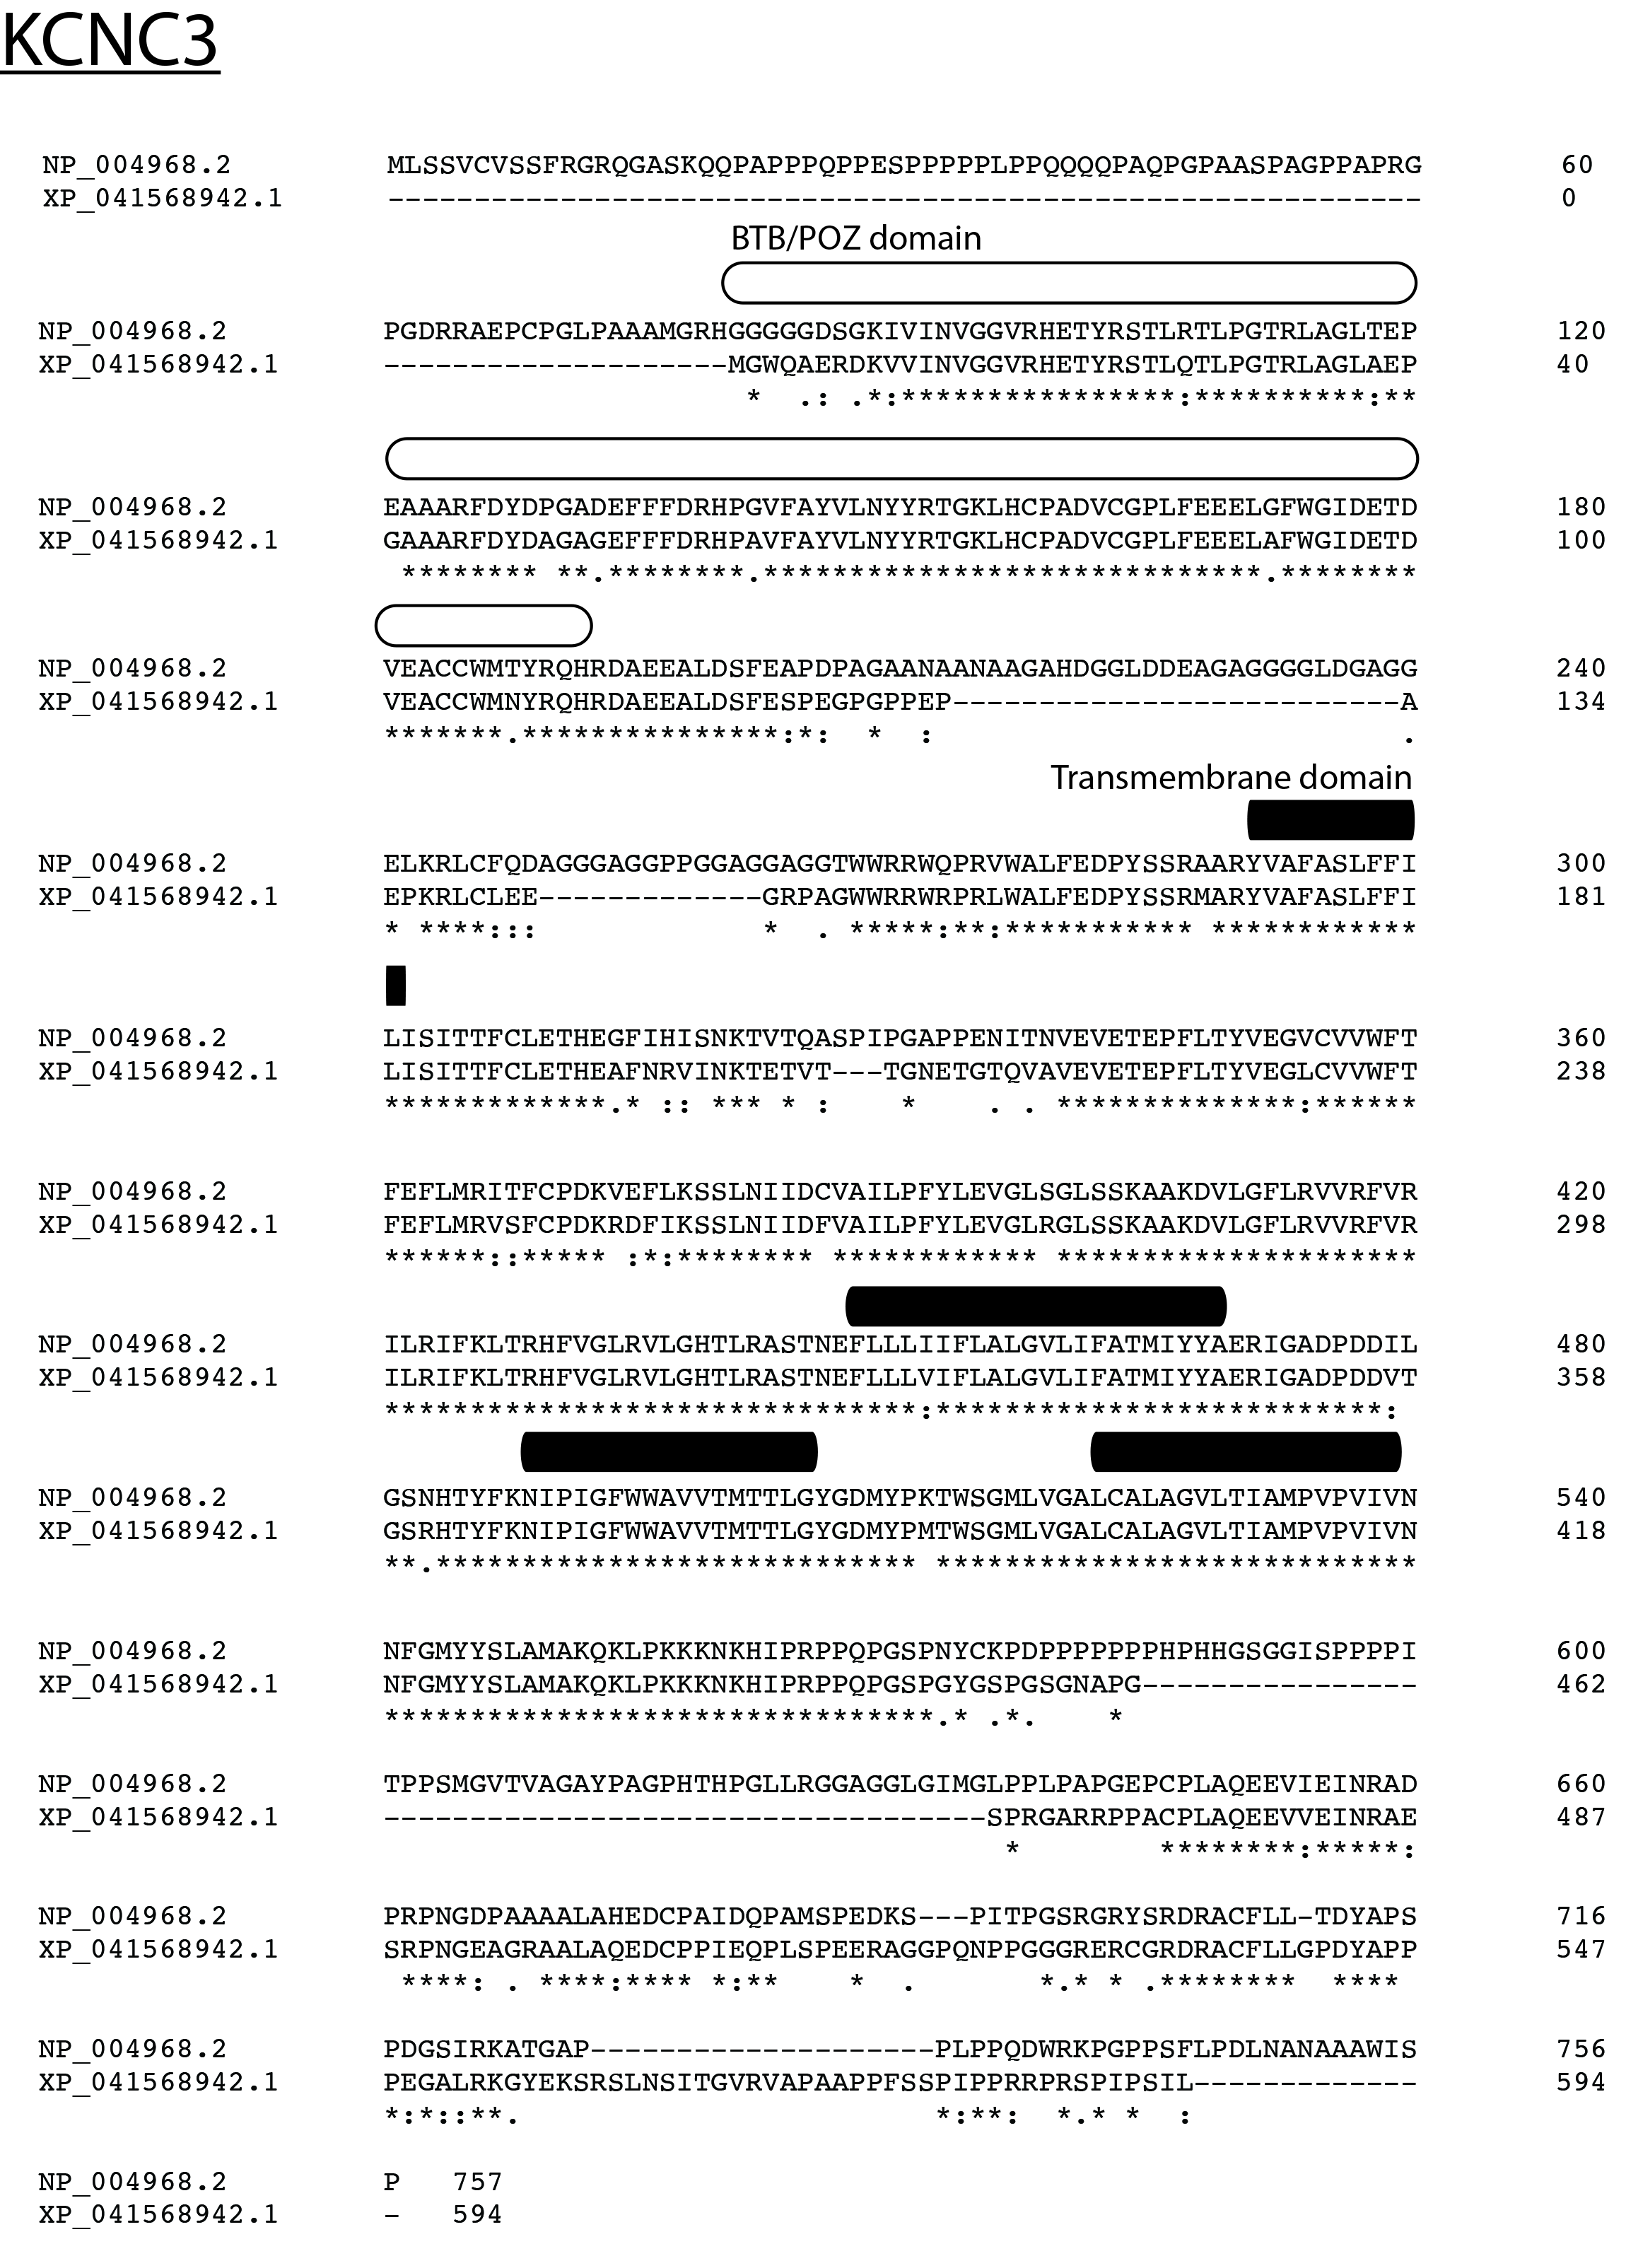

Supplement: supp [file elife-81992-supp-v1.zip › elife_poa_e81992_Figure_7_figure_supplement_3.tif]
